1 **X chromosome and autosomal recombination are differentially sensitive to**  
2 **disruptions in SC maintenance**

3

4 Katherine Kretovich Billmyre<sup>1\*</sup>, Cori K. Cahoon<sup>1,2\*</sup>, G. Matthew Heenan<sup>1</sup>, Emily  
5 Wesley<sup>1,5</sup>, Zulin Yu<sup>1</sup>, Jay R. Unruh<sup>1</sup>, Satomi Takeo<sup>3</sup>, and R. Scott Hawley<sup>1,4</sup>

6

7 <sup>1</sup> Stowers Institute for Medical Research, Kansas City, MO, 64110, United States of  
8 America

9 <sup>2</sup>Institute of Molecular Biology, Department of Biology, University of Oregon, Eugene,  
10 United States of America

11 <sup>3</sup>Department of Biological Sciences, Tokyo Metropolitan University, Japan

12 <sup>4</sup> Department of Molecular and Integrative Physiology, University of Kansas Medical  
13 Center, Kansas City, KS, 66160, United States of America

14 <sup>5</sup> University of Missouri-Kansas City, Kansas City, MO, 64110, United States of America

15 \* These authors contributed equally

16

17

18 Corresponding Author:

19 R. Scott Hawley

20 Stowers Institute for Medical Research

21 Kansas City, MO 64110

22 Phone (816) 926-4427

23 Fax (816) 926-2060

24 [rsh@stowers.org](mailto:rsh@stowers.org)

25

26

27

28

29

30

31

32 Key words: synaptonemal complex, meiosis, homologous recombination, crossing over

33

34

35

## 36 **Abstract (150 words)**

37 The synaptonemal complex (SC) is a conserved meiotic structure that regulates the  
38 repair of double strand breaks (DSBs) into crossovers or gene conversions. The  
39 removal of any central region SC component, such as the *Drosophila melanogaster*  
40 transverse filament protein C(3)G, causes a complete loss of SC structure and  
41 crossovers. To better understand the role of the SC in meiosis, we used CRISPR/Cas9 to  
42 construct three in-frame deletions within the predicted coiled-coil region of the C(3)G protein.  
43 These three deletion mutants disrupt SC maintenance at different times during pachytene and  
44 exhibit distinct defects in key meiotic processes, allowing us to define the stages of pachytene  
45 when the SC is necessary for homolog pairing and recombination. Our studies demonstrate  
46 that the X chromosome and the autosomes display substantially different defects in pairing and  
47 recombination when SC structure is disrupted, suggesting that the X chromosome is potentially  
48 regulated differently than the autosomes.

49

## 50 **Introduction**

51 Several facets of meiosis ensure the faithful inheritance of chromosomes from  
52 parents to offspring. During the creation of eggs and sperm the genome must be  
53 reduced to a haploid state containing a single set of chromosomes; the failure to  
54 properly segregate chromosomes results in chromosome missegregation, leading to  
55 gametes with an incorrect number of chromosomes. Indeed, errors in meiotic  
56 chromosome segregation are the leading cause of miscarriage and aneuploidy in  
57 humans, which can result in chromosomal disorders such as Down syndrome and  
58 Turner syndrome (reviewed in (Hassold et al., 2007)).

59 Proper segregation of chromosomes during meiosis relies on the formation of  
60 programmed double-strand breaks (DSBs), which are initiated when the evolutionarily  
61 conserved type II DNA topoisomerase-like protein, Spo11 (Mei-W68 in *Drosophila*),  
62 forms programmed DSBs (Keeney et al., 1997; McKim and Hayashi-Hagihara, 1998).  
63 These DSBs are then repaired as crossover or gene conversion events (Fig 1A,B).  
64 Crossovers mature into chiasmata, which physically hold homologous chromosomes  
65 together from nuclear envelope breakdown until homolog separation at anaphase I, thus  
66 ensuring proper segregation of chromosomes (Nicklas, 1974). The placement of  
67 crossover events is highly non-random and is strictly regulated by multiple processes  
68 (Hughes et al., 2018). First, crossover interference prevents two crossovers from  
69 occurring in close proximity to each other (Berchowitz and Copenhaver, 2010). Second,  
70 crossovers are excluded from the heterochromatin. Third, as a result of the centromere  
71 effect, crossing over is also reduced in those euchromatic regions that lie in proximity to  
72 the centromeres (Hughes et al., 2018). Finally, even within the medial and distal  
73 euchromatin, crossing over is substantially higher toward the middle of the chromosome  
74 arms (Szauter, 1984). These constraints do not affect the frequency or distribution of gene  
75 conversion events, which appear to be randomly distributed throughout the euchromatin  
76 (Crown et al., 2018; Miller et al., 2016, 2012). Thus, the control of crossover distribution may  
77 act at the level of DSB fate choice, rather than in determining the position of DSBs.

78 Previous studies have suggested that the synaptonemal complex (SC), a large protein  
79 structure that forms between homologous chromosomes, may play a role in controlling  
80 crossover distribution (Libuda et al., 2013). The SC is a highly conserved tripartite structure,  
81 with two lateral elements and a central region (Fig 1C) (reviewed in (Cahoon and

82 Hawley, 2016; Zickler and Kleckner, 2015, 1999)). The central region is composed of  
83 transverse filament and central element proteins, while the lateral element proteins  
84 connect the central region to the chromosome axes (Fig 1C). The known proteins that  
85 make up the *Drosophila* central region include the main transverse filament protein  
86 C(3)G, the transverse filament-like protein Corolla, and the central element protein  
87 Corona (CONA) (Collins et al., 2014; Page et al., 2008; Page and Hawley, 2001).

88 Work in *C. elegans* has shown that the SC functions to monitor crossover  
89 placement by preventing additional crossover designation in a region adjacent to an  
90 existing crossover precursor (Libuda et al., 2013; Nadarajan et al., 2017). Furthermore,  
91 there is evidence in *S. cerevisiae* that Zip1, a transverse filament protein, has two  
92 separable functions - one in building the SC and the other in recombination (Storlazzi et  
93 al., 1996; Voelkel-Meiman et al., 2016). Based on what is known in other model  
94 systems, it is likely that the *Drosophila* SC is also playing a role in regulating the fate of  
95 DSBs and monitoring crossover placement.

96 In *Drosophila*, approximately 24 DSBs are formed in early pachytene. This  
97 occurs in the context of fully formed SC after chromosome synapsis is already complete  
98 (Lake et al., 2013; Lindsley et al., 1977; Mehrotra and McKim, 2006). In the absence of  
99 the central region of the SC, DSB formation is substantially reduced, but not eliminated.  
100 Nonetheless, even in the presence of residual DSBs, there is a complete loss of  
101 crossover formation (Collins et al., 2014; Hughes et al., 2018; Mehrotra and McKim,  
102 2006; Page et al., 2007). The abolishment of the central region of the SC also results in  
103 a high frequency of unpaired homologs during pachytene (Christophorou et al., 2013;  
104 Joyce et al., 2013; Sherizen et al., 2005; Takeo et al., 2011). In addition to disrupting



105 meiotic pairing, the loss of any of the known central region components in the (pre-  
106 meiotic) mitotic region of the ovaries also impairs mitotic pairing of the *2nd* and *3rd*  
107 chromosomes (Christophorou et al., 2013).

108         Since the vast majority of SC mutants are null mutants and therefore fail to form  
109 any SC structure, it is difficult to investigate the interactions of the wildtype versions of  
110 these proteins at the protein level or discover how the SC is involved in DSB repair and  
111 fate choice. In *Drosophila*, the study of transgenes carrying in-frame deletions of either  
112 the N- or C-terminal globular domains of C(3)G have shown that both of these regions  
113 are required for proper SC assembly and crossover formation (Jeffress et al., 2007).  
114 However, these defects were too severe to allow us to investigate the function of the SC  
115 in crossover placement and formation. One domain which has not been tested is the  
116 large predicted coiled-coil domain in C(3)G. Coiled-coil domains are a key conserved  
117 feature of transverse filament proteins across many organisms and are known to be  
118 important for protein-protein interactions (Lupas and Bassler, 2017).

119         Here we characterize three in-frame deletion mutations in the coiled coil domain  
120 of the *Drosophila melanogaster c(3)G*, all of which cause a partial loss of SC function at  
121 different stages in early meiosis. We take advantage of the different stages of SC loss  
122 to examine when the SC is necessary for multiple meiotic events such as pairing and  
123 recombination. Unlike any previously characterized *Drosophila* meiotic mutants (Baker and  
124 Hall, 1976; Hughes et al., 2018; Parry and Sandler, 1974), the effects of these mutants on X  
125 chromosome recombination is different from their effects on autosomal recombination. We  
126 infer from this observation that chromosomes can respond differently to a failure in SC  
127 maintenance. We also show that the SC in early pachytene is important for the

128 maintenance of euchromatic pairing, especially in the centromere-distal regions of the  
129 chromosome arms. The maintenance of X chromosome pairing is more sensitive to SC  
130 defects than is pairing maintenance on the autosomes, suggesting there may be  
131 additional chromosome-specific processes that mediate pairing. These mutants allow us  
132 for the first time to examine the temporal requirement for the synaptonemal complex in  
133 crossover placement and maintenance of pairing.

134

## 135 **Results**

### 136 **A 213 amino acid in-frame deletion within the coiled-coil region of C(3)G impairs** 137 **the maintenance of the SC in early-mid pachytene**

138 The two previous studies of the functional anatomy of C(3)G have relied on the analysis  
139 of transgenic constructs bearing in-frame deletions (Jeffress et al., 2007; Page and  
140 Hawley, 2001). While extremely useful, transgenes have the disadvantage of non-  
141 endogenous expression levels and improper temporal expression. Based on previous  
142 studies in *S. cerevisiae* (Tung and Roeder, 1998) and in *Drosophila* (Page and Hawley,  
143 2001), CRISPR/Cas9 was employed to construct an in-frame deletion,  $c(3)G^{cc\Delta 1}$ ,  
144 removing the base pairs encoding 213 amino acids (L340-A552) from the 488 amino  
145 acid predicted coil-coiled domain of C(3)G (Fig 2A, See Methods).

146 We first asked if  $c(3)G^{cc\Delta 1}$  mutants retained the ability to assemble and  
147 disassemble the SC with normal kinetics. In wild type flies, components of the central  
148 region of the SC are associated with paired centromeres during the pre-meiotic mitotic  
149 divisions (Christophorou et al., 2013; Joyce et al., 2013). By early pachytene these  
150 proteins are assembled as tripartite SC that is visible as long, continuous tracks of

151 Corolla and C(3)G (Fig 2B, Fig 2.1A). The SC remains fully assembled until mid-late  
152 pachytene (stages 5/7), at which point the SC is removed from the euchromatic  
153 chromosome arms but remains at the centromeres in mid pachytene (Fig 1B) (reviewed  
154 (Hughes et al., 2018)). We assessed SC assembly in homozygous *c(3)G<sup>ccΔ1</sup>* females  
155 using a Corolla antibody to mark the central region of the SC. In early pachytene the  
156 total length of the SC was similar to wildtype with a decrease in total SC length  
157 occurring in early-mid pachytene and a significant decrease in mid pachytene (Fig 2B,C;  
158  $p=0.01$ ). However, the SC which formed in early-mid pachytene showed obvious  
159 discontinuities (Fig 2B).

160 To determine whether or not the removal of a large region of the coiled-coil  
161 domain in *c(3)G<sup>ccΔ1</sup>* mutants changed the tripartite structure of the SC, we measured the  
162 distance between the C-termini of C(3)G. This was accomplished using a  
163 superresolution technique, Stimulated Emission Depletion (STED), in conjunction with a  
164 C(3)G C-terminal specific antibody (Anderson et al., 2005; Collins et al., 2014). In wild  
165 type controls the distance between the C-termini of C(3)G was 118.4 nm ( $\pm 0.6$  nm  
166 SEM), while the distance in *c(3)G<sup>ccΔ1</sup>* mutants was reduced to 67.8 nm ( $\pm 0.1$  nm SEM)  
167 (Fig 2.1C). The decrease in SC width is might be explained by the decreased length of  
168 C(3)G due to the 213 amino acids that were deleted. Because a single amino acid  
169 residue in a helix is predicted to be 0.15 nm in length, one would expect the decrease in  
170 length of a single C(3)G<sup>ccΔ1</sup> homodimer to be 32 nm. Therefore, the width of the SC  
171 (which contains C(3)G homodimers arranged in a head to head orientation) would be  
172 predicted to be reduced by 64 nm in *c(3)G<sup>ccΔ1</sup>* mutants. Although the observed 50 nm  
173 decrease in the width of the SC is less than expected, the difference may be due to

174 differences in the way that the C(3)G<sup>ccΔ1</sup> homodimer interacts with the oppositely  
175 oriented homodimer emanating from the other lateral element. Most importantly, the  
176 reduction in coiled-coil length created by removal of a large portion of the coiled-coil  
177 domain does not disrupt the formation of tripartite SC, as is illustrated by the two lateral  
178 tracks of C(3)G and the single track of Corolla observed using STED (Fig 2.1C,D).

179

180 **Loss of SC maintenance in early-mid pachytene is correlated with a reduction in**  
181 **X chromosome crossing over**

182 The progressive (or temporal) loss of SC in *c(3)G<sup>ccΔ1</sup>* flies allowed us to determine  
183 whether or not the perdurance of full-length SC until early-mid pachytene was required  
184 for proper crossing over and/or crossover placement. We examined recombination on  
185 the X chromosome and found that the total amount of recombination along the entire  
186 chromosome was decreased from 63 cM to 11.8 cM (Fig 3A, Table 1). This reduction in  
187 exchange was clearly polar, a well-known attribute of recombination-deficient mutants in  
188 *Drosophila* (Baker and Hall, 1976). Specifically, the chromosomal region distal and  
189 medial to the centromere from *scute (sc)* to *vermillion (v)* exhibited a very low level of  
190 crossing over (3.7% of wild type) while the centromere-proximal region from *v* to *yellow<sup>+</sup>*  
191 (*y<sup>+</sup>*) was only reduced to 31.3% of wild type (Fig 3A, Table 1).

192 The analysis of crossing over on the 3rd chromosome did not reveal a reduction  
193 in total map length when comparing wild type and *c(3)G<sup>ccΔ1</sup>* flies (Fig 3B, Table 2, 50.9  
194 cM and 64.4 cM respectively). However, the pattern of exchange was again altered in a  
195 polar fashion, with a decrease in distal recombination between *roughoid (ru)* and *hairy*

196 (h) (Fig 3B, Table 2, 58.2% of wild type) and a large increase (to 447% of wild type) in  
197 the centromere-proximal region between *scarlet* (*st*) and *curled* (*cu*) (Fig 3B, Table 2).

198 To ensure the *3rd* chromosome recombination phenotype was representative of  
199 both large autosomes, we examined recombination on the *2nd* chromosome. As shown  
200 in Fig 3.1 and Table 3, the effect of the *c(3)G<sup>ccΔ1</sup>* deletion on *2nd* chromosome  
201 recombination mirrored that observed for the *3rd* chromosome with a decrease in distal  
202 recombination and a large increase on centromere-proximal exchange (Fig 3.1, Table  
203 3). The greater than 300% increase in recombination across the centromere-proximal  
204 region on both the *2nd* and *3rd* chromosomes suggests that normal, full-length SC in  
205 early-mid and mid pachytene is regulating, directly or indirectly, crossover placement  
206 along the length of the chromosome.

207 The striking difference in recombination patterns between the *X* chromosome  
208 and autosomes suggest that the *X* chromosome responds differently to aberrations in  
209 the SC in early-mid pachytene than the autosomes. Such chromosome-specific defects  
210 in recombination have not been previously documented in *Drosophila* (Hughes et al.,  
211 2018; Parry and Sandler, 1974).

212

### 213 **Smaller in-frame deletions within the putative coiled-coil domain also cause a** 214 **loss of SC maintenance**

215 One potentially confounding factor in the analysis of the *c(3)G<sup>ccΔ1</sup>* mutants was the  
216 decrease in the width of the SC (Fig 2.1C) caused by the removal of a large region of  
217 the coiled-coil domain. The deletion of such a large region of the coiled coil could  
218 change the ability of the C(3)G protein to interact with itself and form stable SC but it

219 might also remove sites important for interacting with other proteins. Therefore, in an  
220 attempt to separate the multiple phenotypes seen in  $c(3)G^{cc\Delta 1}$  flies, we created two  
221 smaller deletions within the larger deletion,  $c(3)G^{cc\Delta 2}$  (D346-T361) and  $c(3)G^{cc\Delta 3}$  (K465-  
222 V471) (Fig 4A). These smaller regions should not significantly affect the length of the  
223 C(3)G protein based on the small number of amino acids deleted. These sites were  
224 picked based on regions of C(3)G where the COILS score (Lupas et al., 1991) dipped  
225 suggesting a loss of coiled-coil structure (Fig 4.1A). We hypothesized these might be  
226 regions important for regulation of SC structure and/or function, independent of SC  
227 width.

228       When SC formation in  $c(3)G^{cc\Delta 2}$  and  $c(3)G^{cc\Delta 3}$  mutants were examined by Corolla  
229 staining,  $c(3)G^{cc\Delta 2}$  flies displayed a similar SC length to wild type in early and early-mid  
230 pachytene, but displayed a decrease in total SC length in mid pachytene when  
231 compared to wild type (Fig 4B,C,  $p=0.002$ ). However,  $c(3)G^{cc\Delta 3}$  mutants never formed  
232 fully assembled full-length SC (Fig 4B,C,  $p<0.0001$ ). Although each of these deletions is  
233 much smaller than the  $c(3)G^{cc\Delta 1}$  deletion,  $c(3)G^{cc\Delta 2}$  mutants did not display a loss of SC  
234 length until mid pachytene, while  $c(3)G^{cc\Delta 3}$  mutants had a more severe loss of SC in  
235 early pachytene compared to  $c(3)G^{cc\Delta 1}$  mutants (Fig 2B and 4B). We confirmed through  
236 antibody staining that the SC that did assemble in  $c(3)G^{cc\Delta 2}$  and  $c(3)G^{cc\Delta 3}$  mutants  
237 contained C(3)G (Fig 4.1B,C) in addition to Corolla (Fig 4B). The drastic differences in  
238 SC formation and maintenance observed in these mutants gave us a tool to examine  
239 the requirement of SC in early pachytene vs mid pachytene without the removal of a  
240 large structural region of C(3)G.

241

242 **Full-length SC in mid pachytene is not necessary for X recombination**

243 When compared to  $c(3)G^{cc\Delta 1}$  flies, the  $c(3)G^{cc\Delta 2}$  mutants exhibited very different  
244 recombination phenotypes. First,  $c(3)G^{cc\Delta 2}$  mutants had relatively normal levels of  
245 recombination along the X chromosome (109% of wild type, Table 1, Fig 5A) but still  
246 displayed increased centromere-proximal recombination on the 3rd chromosome in the  
247 *st-cu* interval (347% of wild type, Table 2, Fig 5C). Centromere-distal recombination  
248 between *ru-h* on the 3rd chromosome was reduced to 65.5% of wild type levels in  
249  $c(3)G^{cc\Delta 2}$  (Fig 5C, Table 2).

250 In contrast to  $c(3)G^{cc\Delta 2}$ , the  $c(3)G^{cc\Delta 3}$  deletion greatly reduced recombination on  
251 the X chromosome to 4.5% of wild type (Fig 5B, Table 1). This reduction was similar to,  
252 but more severe than, the reduction in X recombination seen in  $c(3)G^{cc\Delta 1}$  mutants  
253 (18.7% of wild type, Table 1, Fig 3A). Additionally,  $c(3)G^{cc\Delta 3}$  mutants mimicked the 3rd  
254 chromosome recombination pattern we saw in  $c(3)G^{cc\Delta 1}$  and  $c(3)G^{cc\Delta 2}$  (Fig 3B, Fig 5C,  
255 Table 2) with a centromere-distal reduction and a large centromere-proximal increase in  
256 recombination (Fig 5D, distal = 25.5% of wild type, proximal = 404% of wild type). These  
257 large increases in proximal exchange parallel those observed in  $c(3)G^{cc\Delta 1}$  mutants for  
258 both the 2nd and 3rd chromosomes. We note that in all cases the mutant and control  
259 crosses carry identical pericentromeric regions and therefore the observed effects on  
260 exchange in the centromere-proximal regions of the autosomes cannot be attributed to  
261 unrelated structural changes (See Methods).

262

263 **DSB formation in  $c(3)G^{cc\Delta 1}$ ,  $c(3)G^{cc\Delta 2}$ , and  $c(3)G^{cc\Delta 3}$  mutants**

264 To confirm that the decreases in *X* chromosome recombination observed in both the  
265 *c(3)G<sup>ccΔ1</sup>* and *c(3)G<sup>ccΔ3</sup>* mutants were not due to a large decrease in the formation of  
266 DSBs, we assessed DSB formation using  $\gamma$ H2AV, a phosphorylated form of the histone  
267 variant H2AV that specifically marks sites of DSBs. Although both *c(3)G<sup>ccΔ1</sup>* and  
268 *c(3)G<sup>ccΔ3</sup>* flies exhibited normal kinetics for DSB repair from early to mid pachytene,  
269 *c(3)G<sup>ccΔ1</sup>* flies (but not *c(3)G<sup>ccΔ3</sup>* flies) displayed a decrease in the number of DSBs  
270 formed in early pachytene (Fig 5.1A,  $p=0.03$ ). Because *X* chromosome recombination  
271 was more severely affected in *c(3)G<sup>ccΔ3</sup>* flies compared to *c(3)G<sup>ccΔ1</sup>* flies, we do not  
272 believe the early pachytene decrease in *c(3)G<sup>ccΔ1</sup>* mutants is biologically relevant to the  
273 decrease in crossing over on the *X* chromosome. Lastly, we assessed DSB formation in  
274 *c(3)G<sup>ccΔ2</sup>* flies and saw a slight decrease in the number of DSBs formed in early  
275 pachytene compared to wild type (Fig 5.1A,  $p=0.006$ ). However, since *c(3)G<sup>ccΔ2</sup>* flies did  
276 not have an overall decrease in the formation of crossovers, the decrease in  $\gamma$ H2AV  
277 may not be biologically significant.

278 One possible explanation for the increase in centromere-proximal recombination  
279 might be the induction of ectopic DSBs within the heterochromatin that were not  
280 induced by Spo11. To confirm that the centromere-proximal recombination was due to  
281 Spo11 breaks, we constructed a double mutant with *c(3)G<sup>ccΔ3</sup>* and *vilya<sup>826</sup>*, a  
282 recombination nodule component that is necessary for the induction of Spo11-induced  
283 breaks (Lake et al., 2015). When we assessed *3rd* chromosome recombination we saw  
284 very low levels of recombination (total map length = 1.4 cM, Fig 5.1B), similar to the  
285 recombination seen in *vilya<sup>826</sup>* alone (Lake et al., 2015). This confirmed that the



286 crossovers in  $c(3)G^{cc\Delta 3}$  mutants are due to programmed Spo11 DSBs and not an  
287 increase in DNA damage.

288

### 289 **Chromosome segregation in $c(3)G^{cc\Delta 1}$ , $c(3)G^{cc\Delta 2}$ , and $c(3)G^{cc\Delta 3}$ mutants**

290 All previously characterized mutants in *Drosophila* that are unable to form crossovers,  
291 or have a significant reduction in crossovers genome-wide, display high levels of both *X*  
292 and *4th* chromosome nondisjunction (Collins et al., 2014; Krishnan et al., 2014;  
293 Manheim and McKim, 2003; Page and Hawley, 2001; Yan and McKee, 2013). The high  
294 levels of *X* nondisjunction observed in these recombination-defective mutants involves  
295 the interactions between both non-crossover *X* chromosomes and non-crossover  
296 autosomes (Baker and Hall, 1976; Hughes et al., 2018), such that two *X* chromosomes  
297 segregate from one autosome with the remaining autosomes segregating at random. In  
298 the absence of non-crossover autosomes, non-crossover *X* chromosomes will  
299 segregate normally.

300 When the rate of missegregation of the *X* and *4th* chromosomes was assessed in  
301 all three mutants, neither  $c(3)G^{cc\Delta 1}$  or  $c(3)G^{cc\Delta 2}$  mutants showed significantly increased  
302 levels of *X* or *4th* chromosome nondisjunction when compared to wild type (Table 4).  
303  $c(3)G^{cc\Delta 3}$  mutants displayed low levels of *X* (4.5%) and *4th* (2.0%) non-disjunction (Table  
304 4). However, this low level of non-disjunction is much lower than the 39.2% reported in  
305  $c(3)G$  null mutants where the SC is completely absent (Hall, 1972).

306 The absence of an observed increase in *X* nondisjunction in  $c(3)G^{cc\Delta 1}$  and  
307  $c(3)G^{cc\Delta 2}$  mutants is most likely explained by the absence of the nonexchange  
308 autosomes required to induce *X* chromosome nondisjunction. However, the low levels

309 of X nondisjunction observed in  $c(3)G^{cc\Delta 3}$  mutants might also be compatible with a  
310 proposed role for C(3)G-like proteins in mediating achiasmate segregations (Gladstone  
311 et al., 2009; Previato de Almeida et al., 2019). Therefore, the severe SC fragmentation  
312 present in  $c(3)G^{cc\Delta 3}$  mutants may cause a mild segregation defect even in the presence  
313 of autosomal recombination.

314

315 **The loss of full-length SC in these mutants parallels the decrease in euchromatic**  
316 **homolog pairing**

317 Homolog pairing is reduced in mutants lacking SC (Gong et al., 2005; Page et al., 2008;  
318 Sherizen et al., 2005). Thus, since our mutants exhibit SC defects in early to mid  
319 pachytene, we utilized them to investigate the importance of full-length SC in the  
320 maintenance of homolog pairing in *Drosophila*. Fluorescence In Situ Hybridization  
321 (FISH) was used to examine homologous pairing, and to mark the distal and proximal  
322 loci of the X chromosome.

323 In wild type, 90% to 100% of the X chromosome was paired from early to mid  
324 pachytene (Fig 6A). To determine what the baseline level of pairing is in the absence of  
325 the SC, X chromosome pairing was assessed in females homozygous for a null allele of  
326  $c(3)G$  ( $c(3)G^{68}$ ). In this genotype the centromere-distal region of the chromosome was  
327 most affected, with an average of 37% paired between early and early-mid pachytene,  
328 while the centromere-proximal region was paired in about half the nuclei (Fig 6.1A,  
329 51.5%).

330 Starting at early-mid pachytene  $c(3)G^{cc\Delta 2}$  mutants exhibited a slight pairing defect  
331 at the centromere-distal locus of the X chromosome (Fig 6A, early= 90.9%, early-mid

332 pachytene= 75%, mid pachytene= 58.8%) but were relatively well-paired at the  
333 centromere-proximal locus (Fig 6A, early=93.9%, early-mid pachytene= 95%, mid  
334 pachytene= 88.2%). Both  $c(3)G^{cc\Delta 1}$  and  $c(3)G^{cc\Delta 3}$  mutants displayed a progressive loss  
335 of pairing at both proximal and distal loci on the *X* chromosome.  $c(3)G^{cc\Delta 1}$  mutants had  
336 almost a complete loss of distal pairing by mid pachytene while  $c(3)G^{cc\Delta 3}$  mutants only  
337 maintained 26% pairing (Fig 6A).

338         These abnormalities in pairing maintenance correspond well with the  
339 recombination pattern seen on the *X* chromosome in  $c(3)G^{cc\Delta 1}$  and  $c(3)G^{cc\Delta 3}$  mutants in  
340 the sense that the distal region of the *X* chromosome was more affected than the  
341 proximal regions (Fig 3A and 6A). The centromere-distal decrease in recombination on  
342 the *3rd* chromosome in  $c(3)G^{cc\Delta 1}$  and  $c(3)G^{cc\Delta 3}$  mutants is displayed in conjunction with  
343 a similar loss of pairing. We examined pairing at distal, medial, and proximal loci on the  
344 *3rd* chromosome throughout pachytene. Similar to the *X* chromosome, both  $c(3)G^{cc\Delta 1}$   
345 and  $c(3)G^{cc\Delta 3}$  mutants displayed a similar trend of reduced pairing of the *3rd*  
346 chromosome, with a progressive decrease in centromere-distal pairing that mirrors the  
347 recombination data (Fig 6B). The medial and proximal region of the *3rd* chromosome  
348 remained relatively paired from early to mid pachytene (Fig 6B). It should be noted that  
349 in  $c(3)G^{68}$  null mutants pairing on the *3rd* chromosome was more strongly reduced;  
350 however, the proximal region (45% paired) was still paired more frequently than was the  
351 distal region (35% paired) (Fig 6.1A).

352         To confirm that the loss of distal pairing on the *3rd* chromosome observed in  
353  $c(3)G^{cc\Delta 1}$  and  $c(3)G^{cc\Delta 3}$  mutants was representative of the autosomes, we also  
354 examined pairing on the *2nd* chromosome in  $c(3)G^{cc\Delta 1}$  mutants. Pairing on the *2nd*

355 chromosome mirrored that of the *3rd* chromosome with a progressive loss of distal  
356 pairing but very little effect on medial and proximal pairing (Fig 6.1B). The significant  
357 loss of distal pairing might explain why there are stronger recombination defects in the  
358 distal regions of both the *X* and *3rd* chromosomes in  $c(3)G^{cc\Delta 1}$  and  $c(3)G^{cc\Delta 3}$  flies. By  
359 the same reason, the autosomal pairing that is maintained in these mutants is proximal,  
360 which may allow for an increased number of recombination events that are proximal to  
361 the centromere.

362

### 363 **Centromere pairing in meiosis is not affected in the absence of full-length SC**

364 In wild type *Drosophila* females, the eight centromeres (two for each of the four  
365 chromosomes) pair in the pre-meiotic cysts and then cluster into an average of two  
366 clusters by early pachytene (Takeo et al., 2011). The SC is important for centromere  
367 clustering in early meiotic cells with an average of four clusters in  $c(3)G$ , *cona* and  
368 *corolla* null mutants (Collins et al., 2014; Takeo et al., 2011; Tanneti et al., 2011). Using  
369 an antibody against CID, a centromere specific histone, we assessed if centromere  
370 clustering was altered in the context of SC loss in early to mid pachytene.

371 Oocytes from both wild type,  $c(3)G^{cc\Delta 1}$ , and  $c(3)G^{cc\Delta 2}$  flies contained an average  
372 number of clusters from 1.7 to 2.5 foci in early to mid pachytene (Fig 6.2A,B).  $c(3)G^{cc\Delta 1}$   
373 mutants did display significantly more clusters than controls in early and mid pachytene  
374 (Fig 6.2A,  $p= 0.01$  and  $0.002$  respectively). However, because the average was 2.5 foci,  
375 the loss of SC is not likely to be impacting centromere pairing in  $c(3)G^{cc\Delta 1}$ .  $c(3)G^{cc\Delta 3}$   
376 mutants had an average of 3.6 clusters in all three stages (Fig 6.2B,  $p < 0.001$ ),

377 suggesting that SC assembly defects in early pachytene may be sufficient to disrupt  
378 centromere clustering but not centromere pairing.

379

## 380 **Discussion**

381 The SC plays multiple roles during meiosis that illustrate its importance in ensuring the  
382 successful transmission of genetic information from one generation to the next, yet our  
383 knowledge of how the SC is involved in regulating meiotic processes, such as  
384 recombination and the maintenance of pairing, is limited due to the integral nature of  
385 each SC component. Here we report the first partial loss-of-function SC mutations in a  
386 central region component in *Drosophila*. We use the different stages of SC loss found in  
387 these mutants to show there is a temporal requirement of the SC in the regulation of  
388 crossover number and placement on the X chromosome versus the autosomes (Fig 7).  
389 Additionally, full-length SC is important for maintaining euchromatic homolog pairing in  
390 distal chromosomal regions.

391

## 392 **Regulation of SC assembly and disassembly**

393 Both the regulation of SC assembly and disassembly, and its maintenance after  
394 assembly, is poorly understood. Work in other organisms has shown that post-  
395 translational modifications are important in SC structure and function. It is known that  
396 SUMOylation promotes assembly of the SC while phosphorylation promotes  
397 disassembly of the SC with modifications occurring on multiple SC proteins (Jordan et  
398 al., 2012; Nadarajan et al., 2017; Sato-Carlton et al., 2017). Thus far, no post-  
399 translationally modified sites have been identified on C(3)G. However, it is likely that

400 these sites do exist, and we speculate that sites promoting SC assembly, maintenance,  
401 and disassembly may be disrupted in these mutants.

402 Another possibility is that the deletions described here could destabilize protein-  
403 protein interaction sites between C(3)G and other central region proteins resulting in  
404 unstable SC that is difficult to maintain. We note that the mutant with the smallest  
405 deletion,  $c(3)G^{cc\Delta 3}$ , exhibited the strongest SC defect. While this deletion was predicted  
406 to only disrupt a single coil, the best explanation for the more severe phenotype is that it  
407 actually disrupts the coiled-coil. This may have caused a large disruption in the rest of  
408 the coiled-coil structure. In the future, it will be important to further dissect these  
409 domains to better understand the regulation of SC assembly and disassembly.

410

#### 411 **A role for the SC in the maintenance of homolog pairing**

412 A surprising result from these studies was the ability of these deletions to allow the  
413 progressive loss of homologous euchromatic pairing through pachytene. The  
414 mechanism behind establishing and maintaining homolog pairing is a long-standing,  
415 unanswered question in the meiosis field. Previous work in *Drosophila* has shown that  
416 in the complete absence of the central region proteins C(3)G and CONA, euchromatic  
417 pairing is significantly reduced in early-mid and mid pachytene (Gong et al., 2005; Page  
418 et al., 2008; Sherizen et al., 2005).

419 Our partial loss-of-function mutations have allowed us to test the importance of  
420 C(3)G in maintaining pairing throughout pachytene when SC is present in early  
421 pachytene (unlike previous studies of null mutants in which the SC is always absent).  
422 From these mutants we now have a time line of when the SC is necessary to maintain

423 pairing and recombination on the *X* chromosome and the autosomes. By comparing  
424 these mutants, we can hypothesize that the *X* chromosome needs full-length SC earlier  
425 in pachytene for proper maintenance of pairing and recombination while the autosomes  
426 are likely capable of placing crossovers as late as mid pachytene resulting in a  
427 centromere-proximal shift in crossovers where pairing is maintained (Fig 7).

428 In both  $c(3)G^{cc\Delta 1}$  and  $c(3)G^{cc\Delta 3}$  mutants, distal pairing of the *X* chromosome and  
429 the autosomes was most strongly reduced. One likely explanation for this is that  
430 normally the disassembly of the SC is initiated on the euchromatic chromosome arms  
431 with the centromeric region being removed last. Since the loss of the SC in  $c(3)G^{cc\Delta 1}$   
432 and  $c(3)G^{cc\Delta 3}$  mutants occurs in a manner similar to wild type SC disassembly, the distal  
433 regions of the chromosome may be affected earlier and more strongly than the  
434 centromere-proximal regions. The centromere-proximal region contains a large amount  
435 of heterochromatin that could be mediating pairing interactions and stabilizing pairing in  
436 the absence of the SC (Dernburg et al., 1998). Furthermore, our examination of  
437 centromere pairing suggests that the centromeres are still paired (Fig 6.2) and could be  
438 facilitating the centromere-proximal pairing. This idea is supported by the higher levels  
439 of centromere-proximal pairing compared to distal pairing in  $c(3)G^{68}$  (Fig 6.1A).

440 Finally, we speculate that the ability of the  $c(3)G^{cc\Delta 1}$  mutants to exhibit a  
441 centromere-distal pairing defect that is more severe than the defect seen in  $c(3)G^{68}$   
442 mutants results from the residual proximal crossovers that do form in  $c(3)G^{cc\Delta 1}$  mutants.  
443 Previous work has shown that crossovers can preserve synapsis but only in their vicinity  
444 (Maguire, 1985; Maguire and Riess, 1994). Perhaps the stresses that provoke  
445 separation become more concentrated on the distal regions that lack crossovers. For

446 example, it is possible that the un-tethered distal regions could experience a higher  
447 mechanical stress due to nuclear movements than the pericentric regions containing a  
448 crossover. The lack of a strong pairing defect in  $c(3)G^{cc\Delta 2}$  mutants is probably due to  
449 the persistence of full-length SC until mid pachytene. Together these data support a role  
450 for the SC in maintaining euchromatic pairing during early to mid prophase (Fig 7).

451

### 452 **What causes the increase in centromere-proximal recombination events?**

453 The autosomal increase in centromere-proximal crossovers displayed in these mutants  
454 mimics the interchromosomal effect (Crown et al., 2018; Joyce and McKim, 2009). The  
455 interchromosomal effect has been reported in flies that are heterozygous for  
456 chromosome aberrations that suppress exchange in trans to a wild type chromosome  
457 (Lucchesi et al., 1976). Thus the absence of crossover formation on one chromosome  
458 promotes increased recombination on the other chromosomes, with more crossovers  
459 placed in the centromere-proximal regions (Crown et al., 2018; Joyce and McKim,  
460 2009). The mechanism that controls the interchromosomal effect in balancer  
461 heterozygotes is poorly understood. It is possible that the interchromosomal effect is  
462 partially responsible for the increase in centromere-proximal crossovers in  $c(3)G^{cc\Delta 1}$  and  
463  $c(3)G^{cc\Delta 3}$  mutants due to the loss of *X* chromosome recombination.

464 However, the interchromosomal effect cannot explain the increase in  
465 centromere-proximal recombination in  $c(3)G^{cc\Delta 2}$  mutants since *X* recombination appears  
466 normal. Another explanation for the increase in centromere-proximal recombination  
467 events may be the premature loss of the SC at distal regions of the chromosome. It is  
468 unknown how much of a role the SC plays in the repair of DSBs into crossover versus



469 non-crossover events. It is possible the SC must be present to interact with factors  
470 necessary for regulating the placement of crossovers. For example, Vilya, a pro-  
471 crossover factor, localizes to the SC and DSBs prior to being recruited to recombination  
472 nodules (Lake et al., 2015). If DSB repair on the autosomes does not occur until early-  
473 mid pachytene and the SC is necessary for the determination of a crossover fate, it  
474 follows that distal loss of SC would result in a shift of crossover formation towards  
475 centromere-proximal regions where the SC is still present. This mechanism could also  
476 be increasing centromere-proximal recombination in  $c(3)G^{cc\Delta 1}$  and  $c(3)G^{cc\Delta 3}$  flies.  
477 Alternatively, SC-independent heterochromatic pairing may be holding the centromere-  
478 proximal region in close proximity allowing for crossing over in that region. In addition to  
479 interacting with pro-crossover factors the SC may be interacting with a currently  
480 unknown protein which regulates crossover placement differently on the X chromosome  
481 versus the autosomes.

482

### 483 **Why is there a difference between the X chromosome and the autosomes?**

484 This set of mutants represents a unique tool to investigate not only the temporal  
485 requirements of the SC but the differences in crossover placement between the X  
486 chromosome and the autosomes. Since  $c(3)G^{cc\Delta 2}$  mutants do not display defects in X  
487 chromosome recombination we conclude that full-length SC in early-mid pachytene is  
488 necessary for X chromosome crossover placement (Fig 7). Examining autosomal  
489 recombination in all three mutants suggests that full-length SC is necessary in mid  
490 pachytene for proper crossover distribution on the autosomes (Fig 7). There are multiple

491 explanations for the recombination differences between the *X* chromosome and the  
492 autosomes.

493         The first of these hypotheses is that there might exist a timing difference in either  
494 synapsis or crossover placement between the *X* chromosome and the autosomes. Work  
495 in *C. elegans* has provided evidence for timing differences between the sex  
496 chromosomes and the autosomes. For example, the *X* chromosome initiates pre-  
497 meiotic DNA replication later than the autosomes (Jaramillo-Lambert et al., 2007;  
498 Mlynarczyk-Evans and Villeneuve, 2017). Additionally, in *C. elegans* the *X* chromosome  
499 and the autosomes pair at the same time but synapsis of the *X* chromosome is delayed  
500 compared to the autosomes (Mlynarczyk-Evans and Villeneuve, 2017). The timing of  
501 when each chromosome is fully synapsed could be critical to ensure normal crossover  
502 placement, and the premature disruption of synapsis may affect the activity of pro-  
503 crossover factors. For example in *C. elegans*, the XND-1 protein is required for  
504 genome-wide crossover placement and is important for normal rates of DSBs on the *X*  
505 chromosome (Wagner et al., 2010). Currently, it is unknown in *Drosophila* if there are  
506 differences in the timing of DSB repair or synapsis of the *X* chromosome as compared  
507 to the autosomes, and our data suggest this as a possibility.

508         A second, but not mutually exclusive, explanation for the differences between the  
509 chromosomes may be a structural one. The *X* chromosome is acrocentric (centromere  
510 is near the end of the chromosome), while the autosomes are both metacentric  
511 (centromere is near the center of the chromosome), and perhaps, these structural  
512 differences mean that the *X* chromosome is more sensitive to loss of the SC. Our data  
513 suggest that loss of SC maintenance disrupts the maintenance of euchromatic homolog

514 pairing more severely on the *X* chromosome than on the autosomes. It is unknown if  
515 metacentric chromosomes are different in terms of synapsis and recombination as  
516 compared to acrocentric chromosomes, and further investigation is needed to determine  
517 if structural differences affect these processes.

518 It is clear from decades of research that the regulation of recombination requires  
519 many factors and precise timing. Here we show that the SC plays a vital role in  
520 maintaining homolog pairing and proper crossover distribution in *Drosophila* female  
521 meiosis. Many differences between sex chromosomes and autosomes have been  
522 documented in a multitude of organisms, and our data are consistent with these  
523 differences extending into the processes that control chromosome pairing and  
524 recombination. With this set of mutants, we have established a new system to examine  
525 *X* chromosome and autosome biology in *Drosophila* meiosis that will allow future work  
526 to unravel the mechanism behind meiotic chromosomal differences.

527

## 528 **Materials and Methods**

### 529 *Stocks*

530 *Drosophila* stocks were maintained on standard food at 24°C. Descriptions of genetic  
531 markers and chromosomes can be found at <http://www.flybase.org/>. Wild type refers to  
532 the genotype: *y w; +/+; +/+; sv<sup>spa-pol</sup>*, unless stated otherwise. The key resource table  
533 contains a list of all the fly stocks used in this manuscript.

534

### 535 *Construction of c(3)G<sup>ccΔ1</sup> mutants*

536 To aid in screening for  $c(3)G^{cc\Delta 1}$  mutant flies, we incorporated a *piggyBac*  
537 transposon carrying a 3xP3-DsRed that expresses in the fly eye into the intron directly  
538 downstream of the intended  $c(3)G^{cc\Delta 1}$  deletion [intron 5 of  $c(3)G$ ] in the homologous  
539 repair template plasmid. Repair of the Cas9-induced DSB using the homologous repair  
540 plasmid will insert the desired mutation and the *piggyBac* transposon into the genome at  
541 the  $c(3)G$  locus. This allowed us to screen for the flies that undergo DSB repair off the  
542 homologous repair plasmid by searching for those that express dsRed in the eyes.  
543 Then, after isolation and confirmation of the desired  $c(3)G$  mutation, we excised the  
544 *piggyBac* transposon by crossing in a transposase. This removed any potential effect  
545 the *piggyBac* transposon may have on the expression of  $c(3)G$ .

546 The *piggyBac* transposon plasmid was constructed to have flanking *AarI* and  
547 *SapI* restriction sites (Addgene 51434). We used PCR to obtain two fragments of  $c(3)G$   
548 from the *Drosophila* genome that flanked the position where the *piggyBac* would be  
549 inserted and added in either an *AarI* or *SapI* restriction site. The ~2600-bp fragment  
550 upstream of the *piggyBac* insertion site contained *AarI* sites and was obtained using  
551 these primers: Forward, tataCACCTGCattaCCGAcgctagtggtccttagagttcag; Reverse,  
552 gcagCACCTGCgcgTAAAtgaaaagaattataagtcttaccattaggtatc. The ~1000-bp  
553 fragment downstream of the *piggyBac* insertion site contained *SapI* sites and was  
554 obtained using these primers: Forward, gccgGCTCTTCNTAAcctttttctacaaaatgattatt;  
555 Reverse, gtatGCTCTTCNCGGtcatcaaaacatagtttagtatcg.

556 To insert these fragments into the *piggyBac* plasmid, the plasmid and the  
557 downstream *SapI*-containing PCR was digested with *SapI* (also called *LguI* from  
558 ThermoFisher, ER1931), phosphatase treated (Antarctic phosphatase, NEB M0289S),

559 and ligated together using T4 ligase (NEB, M0202S). Then, to make the  $c(3)G^{cc\Delta 1}$   
560 mutation, the upstream *AarI*-containing PCR fragment was TOPO cloned using the Zero  
561 Blunt TOPO kit (ThermoFisher, 451245) and cut using the restriction enzyme *HindIII*  
562 (NEB, R0104S) to remove the 702-bp fragment from  $c(3)G$  creating the  $c(3)G^{cc\Delta 1}$   
563 mutation. The cut TOPO *AarI* plasmid was then phosphatase treated and ligated back  
564 together to create the  $c(3)G^{cc\Delta 1}$  deletion. Then, this plasmid was digested with *AarI*  
565 (ThermoFisher ER1581) to generate a ~1900-bp fragment containing the  $c(3)G^{cc\Delta 1}$   
566 deletion, which was cloned into the *piggyBac* plasmid containing the downstream *SapI*  
567  $c(3)G$  fragment. This created the  $c(3)G^{cc\Delta 1}$  homologous repair template plasmid, which  
568 was fully sequenced to ensure all cloning occurred in the correct direction (See Key  
569 Resources for primers).

570 A CRISPR target sequence was selected from the flyCRISPR Optimal Target  
571 Finder (<http://tools.flycrispr.molbio.wisc.edu/targetFinder/>). Only a single site upstream  
572 of the  $c(3)G^{cc\Delta 1}$  deletion was selected (AAAGCTTTGTTGGCCTGTATTGG) and  
573 constructed into the pU6-BbsI-chiRNA guide RNA (gRNA) plasmid (Addgene 45946).  
574 Sense (CTTCGAAAGCTTTGTTGGCCTCTAT) and antisense  
575 (AAACATAGAGGCCAACAAAGCTTTC) oligonucleotides were ordered from IDT and  
576 cloned into the gRNA plasmid as described by the flyCRISPR subcloning pU6-gRNA  
577 protocol (<http://flycrispr.molbio.wisc.edu/protocols/gRNA>). After selection of the CRISPR  
578 target sequence, three single nucleotide polymorphisms (SNPs) were made in the  
579 CRISPR target sequence (the mutated bases are shown in bold:  
580 ccaatagaag**cg**aataaagcttt) in the  $c(3)G^{cc\Delta 1}$  homologous repair template plasmid to  
581 prevent Cas9 from cutting this plasmid. These SNPs were made using the Quik Change

582 II XL Site-Directed Mutagenesis Kit (Agilent Technology, 200521). The gRNA and  
583  $c(3)G^{cc\Delta 1}$  homologous repair template plasmid were sent to Genetivision (Houston,  
584 Texas) for injection into  $y\ m[VASA-Cas9-3xGFP]ZH-2A-3xRFP\ w^{1118}/FM7c$  flies (BLM  
585 51323). Genetivision injected the gRNA plasmid at 250 ng/ $\mu$ l and the  $c(3)G^{cc\Delta 1}$   
586 homologous repair template at 500 ng/ $\mu$ l.

587  $c(3)G^{cc\Delta 1}$  was isolated by crossing the G0 injected flies to  $y\ w; Pr/TM3; sv^{spa-pol}$ ,  
588 then the F1 progeny were screened for expression of dsRed in the fly eyes. Due to the  
589  $VASA-Cas9$  transgene also being marked with RFP, only F1 males could be screened  
590 for CRISPR insertion using dsRed expression. 15 G0 males were recovered from the  
591 commercially injected embryos (Genetivision) and crossed to  $y\ w; Pr/TM3; sv^{spa-pol}$ . PCR  
592 and Sanger sequencing were used to confirm that that male had repaired off the repair  
593 template to incorporate the  $c(3)G^{cc\Delta 1}$  deletion mutation at the genomic  $c(3)G$  locus (See  
594 Key Resources). This was done by using forward and reverse primers that were outside  
595 of the 1kb both up and downstream repair sequence (See Key Resources). Following  
596 removal of the *piggyBac*, we sequenced the entire  $c(3)G$  gene to confirm both the  
597 precise excision of the transposon and that the only lesion in the gene was the desired  
598  $c(3)G^{cc\Delta 1}$  deletion mutation. Only one male was identified and was used to establish a  
599 stock.

600

#### 601 *Construction of $c(3)G^{cc\Delta 2}$ and $c(3)G^{cc\Delta 3}$ mutants*

602 A CRISPR target sequence was selected from the flyCRISPR Optimal Target Finder  
603 (<http://tools.flycrispr.molbio.wisc.edu/targetFinder/>). Two guide RNAs were created for  
604  $c(3)G^{cc\Delta 2}$  and  $c(3)G^{cc\Delta 3}$  (guide 1  $c(3)G^{cc\Delta 2}$ : GCTCAATGCGATCTTCAAGCTGG, guide 2

605 *c(3)G<sup>ccΔ2</sup>*: GATTGACTGATC**AGGCAACGAGG**, guide 1 *c(3)G<sup>ccΔ3</sup>*:  
606 GCTCTTCCTG**ATTGCTGCGATGG**, and guide 2 *c(3)G<sup>ccΔ3</sup>*:  
607 TCTTGAACAACA**AATCTGTCAAGG**) and constructed into the pU6-BbsI-chiRNA guide  
608 RNA (gRNA) plasmid (Addgene 45946). Sense and antisense oligonucleotides (guide 1  
609 *c(3)G<sup>ccΔ2</sup>*: CTTGCTCAATGCGATCTTCAAGCTGG,  
610 AAACCCAGCTTGAAGATCGCATTGAGC; guide 2 *c(3)G<sup>ccΔ2</sup>*:  
611 CTTGATTGACTGATCAGGCAACGAGG, AAACCCTCGTTGCCTGATCAGTCAATC;  
612 guide 1 *c(3)G<sup>ccΔ3</sup>*: CTTGCTCTTCCTGATTGCTGCGATGG,  
613 AAACTCGCAGCAATCAGGAAGAGC; guide 2 *c(3)G<sup>ccΔ3</sup>*:  
614 CTTCTCTTGAACAACA**AATCTGTCAAGG**, AA**ACTGACAGATTGTTGTTCAAGAC**) were  
615 ordered from IDT and cloned into the gRNA plasmid as described by the flyCRISPR  
616 subcloning pU6-gRNA protocol (<http://flycrispr.molbio.wisc.edu/protocols/gRNA>).

617 The homologous repair constructs were created using the NEBuilder HiFi DNA  
618 Kit (NEB, E5520S) and contained 1,000 bases upstream of the first guide RNA target  
619 Cas9 site, the *c(3)G* sequence with either 42 bp (*c(3)G<sup>ccΔ2</sup>*) or 21 bp (*c(3)G<sup>ccΔ3</sup>*)  
620 removed, and 1,000 bases downstream of the second guide RNA site. The PAM  
621 sequences in the *c(3)G* gene were mutated using the Quik Change II XL Site-Directed  
622 Mutagenesis Kit (Agilent Technology). The bases changed are in bold above.

623 Additionally, a restriction site was engineered into the repair template, without creating  
624 coding changes, to aid in genotyping (*SpeI* for *c(3)G<sup>ccΔ2</sup>* and *NheI* for *c(3)G<sup>ccΔ3</sup>*).

625 250 ng of each gRNA plasmid and 500 ng of the homologous repair template  
626 plasmid were injected (BestGene) into *y nosCas9* (on *X* chromosome, BDSC #54591).  
627 Potential CRISPR/Cas9 hits were screened with primers (See Key Resources), which

628 amplify a region spanning the deletion and were digested with either *SpeI* or *NheI*  
629 allowing for visualization of heterozygotes. Once a CRISPR/Cas9 insertion was  
630 identified, the entire *c(3)G* gene was sequenced to ensure the repair plasmid did not  
631 insert.

632

### 633 *Nondisjunction and recombination assays*

634 To assay recombination along the *X* chromosome, females of the genotypes: (1)  $y^1 sc^1$   
635  $cv^1 v^1 f^1 y^+/y w; sv^{spa-pol}$ ; 2)  $y^1 sc^1 cv^1 v^1 f^1 y^+/y w; ru^1 h^1 Diap1^1 st^1 cu^1 c(3)G^{cc\Delta 1} ca^1$ ;  
636  $sv^{spa-pol}/+$ ; 3)  $y^1 sc^1 cv^1 v^1 f^1 y^+/y w; ru^1 h^1 Diap1^1 st^1 cu^1 c(3)G^{cc\Delta 2} ca^1; sv^{spa-pol}/+$ ; 4)  $y^1$   
637  $sc^1 cv^1 v^1 f^1 y^+/y w; ru^1 h^1 Diap1^1 st^1 cu^1 c(3)G^{cc\Delta 3} ca^1; sv^{spa-pol}/+$ ) were crossed to  $y^1 sc^1$   
638  $cv^1 v^1 f^1 car^1/B^SY$  males. For *X* recombination analysis, only the female progeny were  
639 analyzed for the intervals *sc-cv*, *cv-v*, *v-f*, *f-y+*.

640 To assay recombination along the *2nd* chromosome, females of the genotypes:  
641 1)  $y w/w; net^1 dpp^{ho} dpy^{ov1} b^1 pr^1 cn^1/+; ru^1 h^1 Diap1^1 st^1 cu^1 c(3)G^{cc\Delta 1} ca^1/c(3)G^{cc\Delta 1} ca^1$ ;  
642  $sv^{spa-pol}/+$ ; 2)  $w^+/yw; net^1 dpp^{ho} dpy^{ov1} b^1 pr^1 cn^1/+$  were crossed to  $w^+/Y; net^1 dpp^{ho}$   
643  $dpy^{ov1} b^1 pr^1 cn^1$  males. For *2nd* recombination analysis, only the female progeny were  
644 analyzed for the intervals *net-dpp*, *dpp-dpy*, *dpy-b*, *b-pr*, *pr-cn*.

645 To assay recombination frequency along the *3rd* chromosome females of the  
646 following genotypes: 1)  $y w/w^+; ru^1 h^1 Diap1^1 st^1 cu^1 sr^1 e^s ca^1/+$ ; 2)  $y w/w^+; ru^1 h^1$   
647  $Diap1^1 st^1 cu^1 c(3)G^{cc\Delta 1} ca^1/c(3)G^{cc\Delta 1} ca^1; sv^{spa-pol}/+$ ; 3)  $y w/w^+; ru^1 h^1 Diap1^1 st^1 cu^1$   
648  $c(3)G^{cc\Delta 2} ca^1/c(3)G^{cc\Delta 2} ca^1; sv^{spa-pol}/+$ ; 4)  $y w/w^+; ru^1 h^1 Diap1^1 st^1 cu^1 c(3)G^{cc\Delta 3} ca^1/$   
649  $c(3)G^{cc\Delta 3} ca^1; sv^{spa-pol}/+$ ; were crossed to  $w^+/Y; ru^1 h^1 Diap1^1 st^1 cu^1 sr^1 e^s ca^1$  males.



650 For 3<sup>rd</sup> recombination analysis, only the female progeny were analyzed for the  
651 intervals *ru-h*, *h-st*, *st-cu*.

652 To measure the rate of both X and 4<sup>th</sup> chromosome nondisjunction single virgin  
653 females of the indicated genotype were mated to multiple  $X^AY$ , *ln(1)EN*, *v f B*; *C(4)RM*,  
654 *ci ey<sup>R</sup>* males. Calculations to determine the percentage of X and 4<sup>th</sup> chromosome  
655 nondisjunction were performed as previously described (Hawley et al., 1992; Zitron and  
656 Hawley, 1989).

657

#### 658 *Immunostaining of whole-mount ovaries*

659 Germarium preparation for whole-mount immunofluorescence was modified from the  
660 protocol described in (Lake et al., 2015), with dissections performed in PBS with 0.1%  
661 Tween (PBST). Primary antibodies used included affinity-purified rabbit anti-Corolla  
662 (1:2000), mouse anti-C(3)G 1A8-1G2, 5G4-1F1, and 1G5-2F7 (all at 1:500), rabbit anti-  
663 histone H2AVD pS137 (1:500) (Rockland Inc.), mouse anti- $\gamma$ H2AV (1:1000) (Iowa  
664 Hybridoma Bank), rat anti-CID (used at 1:3000; gift from Claudio Sunkel), and rat anti-  
665 CID (1:500) (Hanlon et al., 2018). All secondary antibodies were used at 1:500, and the  
666 secondary antibodies used were Alexa Fluor 488 goat anti-mouse (ThermoFisher,  
667 A11001), Alexa Fluor 555 goat anti-mouse (ThermoFisher, A21422), Alexa Fluor 647  
668 goat anti-mouse (ThermoFisher, A21235), Alexa Fluor 488 goat anti-rabbit  
669 (ThermoFisher, A11008), Alexa Fluor 555 goat anti-rabbit (ThermoFisher, A21428),  
670 Alexa Fluor 647 goat anti-rat (ThermoFisher, A21434), and Alexa Fluor 555 goat anti-rat  
671 (ThermoFisher, A21247).

672 For STED imaging, samples were imaged with 100x, N.A 1.40 oil. objective on a  
673 Leica SP8 Gated STED microscope. Alexa Flour 647 labeled secondary was imaged  
674 with a pulsed white light (80 MHz) tuned to 647 nm; Alexa Fluor 594 labelled secondary  
675 was imaged with the same white laser tuned at 594 nm. Both secondaries were  
676 depleted with a pulsed STED 775 nm laser with 80-90% maximum power. All images  
677 were acquired in 2D mode to improve lateral resolution, and each image was averaged  
678 8 times in line average mode. The emission photons were collected with an internal  
679 Leica HyD hybrid detector with a time gate between 1-6 ns. Raw STED images were  
680 deconvolved with the STED module in Huygens professional deconvolution software  
681 (version 14.10; Scientific Volume Imaging). A theoretical estimated point spread  
682 function was calculated from the raw images metadata. We used the default setting to  
683 process images, but the background was measured from raw data, also the signal to  
684 noise was set in the range of 15-20 depending on the signal intensity.

685

#### 686 *Fluorescent in situ hybridization*

687 FISH probes were designed from bacterial artificial chromosomes (BACs) obtained from  
688 the Children's Hospital Oakland Research Institute (CHORI;  
689 <http://bacpacresources.org/library.php?id=30>). The following BACs were used: for 2L  
690 RP98-28O9 (polytene band 22A2-22A4), RP98-43K24 (polytene band 32E2-32F2),  
691 RP98-7D17 (polytene band 38E4-38F4); for 3L RP98-2N23 (polytene band 61D-61E),  
692 RP98-26C20 (polytene band 69B1-69C2), RP98-3J2 (polytene band 77F5-78B1); for  
693 the X RP98-3D13 (polytene band 3C3-3C7), RP98-9H1 (polytene band 15C1-15D6). To  
694 make the FISH probes, the BACs were PCR amplified using the Illustra GenomiPhi V2

695 DNA Amplification Kit (GE 25-6600-30). The concentration of the BAC DNA was  
696 determined using a Qubit and 10 ng BAC DNA was used per amplification reaction.  
697 The amplification reaction was performed via kit protocol. Next, the amplified BAC was  
698 restriction enzyme digested using *AluI* (NEB R137S), *HaeIII* (NEB R107S), *MseI* (NEB  
699 R0525S), *RsaI* (NEB R0167S), *MboI* (NEB R0147S) and *MspI* (NEB R0106S).  
700 Following the digestion, the DNA was ethanol precipitated with glycogen  
701 (ThermoFisher, 10814010). The precipitated DNA was resuspended in the labeling  
702 buffer from the ULYSIS Nucleic Acid Labeling Kits (ThermoFisher – AF647 kit, U21660;  
703 AF546 kit, U21652). To label the DNA with AF647 or AF546, the protocol in the ULYSIS  
704 Nucleic Acid Labeling Kits was used with 10  $\mu$ L of the digested BAC DNA. The  
705 unreacted dyes were removed from the labeling reaction using Centri-Sep Columns  
706 (Princeton Separation, CS-900).

707 FISH with immunohistochemistry was performed as previously described  
708 (Christophorou et al., 2013), using anti-mouse C(3)G 1A8-1G2, 5G4-1F1, and 1G5-2F7  
709 (all at 1:500) and mouse anti-Orb antibodies 4H8 and 6H4 (1:20 each)(Developmental  
710 Studies Hybridoma Bank, Iowa). C(3)G staining was used to identify meiotic nuclei in  
711 early, early-mid or mid pachytene with the exception that in *c(3)G<sup>cc $\Delta$ 3</sup>* mutants mid  
712 pachytene oocytes were identified using Orb staining due to the lack of SC present. To  
713 measure the 3D distance between the FISH probe foci, a custom ImageJ plug-in (“3D  
714 jru v1”) was used with a slice spacing of 0.20 and pixel spacing of 0.06370 (available at  
715 <http://research.stowers.org/imagejplugins>). A locus was considered paired if the  
716 distance between the FISH probe foci was <0.75  $\mu$ m and unpaired if the distanced  
717 between the FISH probe foci was  $\geq$ 0.75  $\mu$ m.

718

719 *Imaging and image analysis*

720 Except for the STED imaging (see below), all images were acquired on an inverted  
721 DeltaVision microscopy system (GE Healthcare) with an Olympus 100x Objective  
722 (UPlanSApo 100x NA 1.40) and a high-resolution CCD camera or an Applied Precision  
723 OMX Blaze microscope (Issaquah, WA, USA) equipped with a PCO Edge sCMOS  
724 camera. Images were deconvolved (DeltaVision and OMX) and reconstruction was  
725 performed (OMX) using SoftWoRx v. 6.5 software (Applied Precision/GE Healthcare)  
726 following Applied Precision protocols. Images were cropped and brightness and  
727 contrast was slightly adjusted using ImageJ.

728

729 *Length measurements for the synaptonemal complex*

730

731 These were performed utilizing custom macros in ImageJ (NIH, Bethesda, MD). C(3)G  
732 signals corresponding to roughly a single nucleus were traced approximately in 3D as  
733 follows. Firstly, structured illumination images were scaled in x and y by 4 with bilinear  
734 interpolation. Then they were blurred in x and y with a standard deviation of 8 pixels (80  
735 nm). Next a rolling ball background with a radius of 50 pixels was subtracted. The  
736 resulting 3D images were thresholded at 25% of their maximum intensity to create a  
737 mask encompassing the synaptonemal complex fibers. Objects containing less than  
738 500 voxels in 3D corresponded to noise in the image and were removed. Finally, the  
739 images were skeletonized in 3D using the 3D skeletonize plugin (based on (Lee et al.,  
740 1994), CVGIP: Graphical Models and Image Processing) to create single pixel traces of  
741 the SC in three dimensions. These were dilated once to close single pixel gaps and

742 each 3D fiber volume was measured in voxel units for presentation. Single outliers were  
743 tested for and removed with the Grubbs test at a 1% confidence level. Statistical  
744 assessment of volume differences was accomplished with a two tailed T test.

745

#### 746 *Line Profile Analysis of STED data*

747 Following the profile averaging approach described in (Cahoon et al., 2017) we  
748 assessed the width of the SC. Briefly, single slice cross sectional intensity profiles were  
749 generated from manually drawn lines across regions of the SC that appeared to be flat  
750 in the z dimension (traveled along the selected plane for a substantial distance). We  
751 then aligned all of these profiles (as well as the Corolla signals where present) so that  
752 the midpoint between the C(3)G C-termini was at 0. Then, the profiles were averaged to  
753 create low noise average profile distributions. A standard t-test was used for statistical  
754 comparisons between the  $c(3)G^{cc\Delta 1}$  and wild type, the mean and standard error of the  
755 mean (SEM) were reported.

756

#### 757 **Data and software availability**

758 Primary data files for the figures in this paper are publicly accessible  
759 at [www.stowers.org/research/publications/odr](http://www.stowers.org/research/publications/odr). For data analysis, the custom ImageJ  
760 plugins used are available at [research.stowers.org/imagejplugins/zipped\\_plugins.html](http://research.stowers.org/imagejplugins/zipped_plugins.html).

761

#### 762 **Acknowledgements**

763 We thank Claudio Sunkel for antibodies; past and present members of the Hawley lab  
764 for helpful discussion and comments on this manuscript; and Angela Miller for editorial

765 and figure preparation assistance. R.S.H. is an American Cancer Society Research  
766 Professor.

767

## 768 **References**

- 769 Anderson, L.K., Royer, S.M., Page, S.L., McKim, K.S., Lai, A., Lilly, M.A., Hawley, R.S.,  
770 2005. Juxtaposition of C(2)M and the transverse filament protein C(3)G within the  
771 central region of Drosophila synaptonemal complex. Proc. Natl. Acad. Sci. U. S. A.  
772 102, 4482–7. <https://doi.org/10.1073/pnas.0500172102>
- 773 Ashburner, M., Golic, K., Hawley, R., 2005. Chromosomes and position effect  
774 variegation. In Drosophila: A laboratory handbook, 2nd ed., C. ed. Cold Spring  
775 Harbor Laboratory Press, Cold Spring Harbor, NY.
- 776 Baker, B.S., Hall, J.C., 1976. Meiotic mutants: genic control of meiotic recombination  
777 and chromosome segregation. Genet. Biol. Drosoph. Vol. 1a, 351–434.
- 778 Berchowitz, L., Copenhaver, G., 2010. Genetic Interference: Dont Stand So Close to  
779 Me. Curr. Genomics 11, 91–102. <https://doi.org/10.2174/138920210790886835>
- 780 Cahoon, C.K., Hawley, R.S., 2016. Regulating the construction and demolition of the  
781 synaptonemal complex. Nat. Struct. Mol. Biol. 23, 369–377.  
782 <https://doi.org/10.1038/nsmb.3208>
- 783 Cahoon, C.K., Yu, Z., Wang, Y., Guo, F., Unruh, J.R., Slaughter, B.D., Hawley, R.S.,  
784 2017. Superresolution expansion microscopy reveals the three-dimensional  
785 organization of the Drosophila synaptonemal complex. Proc. Natl. Acad. Sci. U. S.  
786 A. 114, E6857–E6866. <https://doi.org/10.1073/pnas.1705623114>
- 787 Christophorou, N., Rubin, T., Huynh, J.-R., 2013. Synaptonemal Complex Components

- 788 Promote Centromere Pairing in Pre-meiotic Germ Cells. PLoS Genet. 9, e1004012.  
789 <https://doi.org/10.1371/journal.pgen.1004012>
- 790 Collins, K.A., Unruh, J.R., Slaughter, B.D., Yu, Z., Lake, C.M., Nielsen, R.J., Box, K.S.,  
791 Miller, D.E., Blumenstiel, J.P., Perera, A.G., Malanowski, K.E., Hawley, R.S., 2014.  
792 Corolla Is a novel protein that contributes to the architecture of the synaptonemal  
793 complex of Drosophila. Genetics 198.
- 794 Crown, K.N., Miller, D.E., Sekelsky, J., Hawley, R.S., 2018. Local Inversion  
795 Heterozygosity Alters Recombination throughout the Genome. Curr. Biol. 28.  
796 <https://doi.org/10.1016/j.cub.2018.07.004>
- 797 Dernburg, A.F., McDonald, K., Moulder, G., Barstead, R., Dresser, M., Villeneuve, A.M.,  
798 1998. Meiotic Recombination in *C. elegans* Initiates by a Conserved Mechanism  
799 and Is Dispensable for Homologous Chromosome Synapsis. Cell 94, 387–398.  
800 [https://doi.org/10.1016/S0092-8674\(00\)81481-6](https://doi.org/10.1016/S0092-8674(00)81481-6)
- 801 Gladstone, M.N., Obeso, D., Chuong, H., Dawson, D.S., 2009. The synaptonemal  
802 complex protein Zip1 promotes bi-orientation of centromeres at meiosis I. PLoS  
803 Genet. 5, e1000771. <https://doi.org/10.1371/journal.pgen.1000771>
- 804 Gong, W.J., McKim, K.S., Hawley, R.S., 2005. All Paired Up with No Place to Go:  
805 Pairing, Synapsis, and DSB Formation in a Balancer Heterozygote. PLoS Genet. 1,  
806 e67. <https://doi.org/10.1371/journal.pgen.0010067>
- 807 Hall, J.C., 1972. CHROMOSOME SEGREGATION INFLUENCED BY TWO ALLELES  
808 OF THE MEIOTIC MUTANT  $c(3)G$  IN DROSOPHILA MELANOGASTER. Genetics  
809 71.
- 810 Hanlon, S.L., Miller, D.E., Eche, S., Hawley, R.S., 2018. Origin, Composition, and

- 811           Structure of the Supernumerary B Chromosome of *Drosophila melanogaster*.  
812           Genetics 210, 1197–1212. <https://doi.org/10.1534/genetics.118.301478>
- 813   Hassold, T., Hall, H., Hunt, P., 2007. The origin of human aneuploidy: where we have  
814           been, where we are going. Hum. Mol. Genet. 16, R203–R208.  
815           <https://doi.org/10.1093/hmg/ddm243>
- 816   Hawley, R.S., Irick, H., Haddox, D.A., Whitley, M.D., Arbel, T., Jang, J., McKim, K.,  
817           Zitron, A.E., New, C., Childs, G., Lohe, A., 1992. There are two mechanisms of  
818           achiasmate segregation in *Drosophila* females, one of which requires  
819           heterochromatic homology. Dev. Genet. 13, 440–467.  
820           <https://doi.org/10.1002/dvg.1020130608>
- 821   Hughes, S.E., Miller, D.E., Miller, A.L., Hawley, R.S., 2018. Female Meiosis: Synapsis,  
822           Recombination, and Segregation in *Drosophila melanogaster*. Genetics 208, 875–  
823           908. <https://doi.org/10.1534/genetics.117.300081>
- 824   Jaramillo-Lambert, A., Ellefson, M., Villeneuve, A.M., Engebrecht, J., 2007. Differential  
825           timing of S phases, X chromosome replication, and meiotic prophase in the *C.*  
826           *elegans* germ line. Dev. Biol. 308, 206–21.  
827           <https://doi.org/10.1016/j.ydbio.2007.05.019>
- 828   Jeffress, J.K., Page, S.L., Royer, S.M., Belden, E.D., Blumenstiel, J.P., Anderson, L.K.,  
829           Hawley, R.S., 2007. The Formation of the Central Element of the Synaptonemal  
830           Complex May Occur by Multiple Mechanisms: The Roles of the N- and C-Terminal  
831           Domains of the *Drosophila* C(3)G Protein in Mediating Synapsis and  
832           Recombination. Genetics 177, 2445–2456.  
833           <https://doi.org/10.1534/genetics.107.078717>



- 834 Jordan, P.W., Karppinen, J., Handel, M.A., 2012. Polo-like kinase is required for  
835 synaptonemal complex disassembly and phosphorylation in mouse spermatocytes.  
836 J. Cell Sci. 125, 5061–5072. <https://doi.org/10.1242/jcs.105015>
- 837 Joyce, E.F., Apostolopoulos, N., Beliveau, B.J., Wu, C. -tin., 2013. Germline Progenitors  
838 Escape the Widespread Phenomenon of Homolog Pairing during *Drosophila*  
839 Development. PLoS Genet. 9, e1004013.  
840 <https://doi.org/10.1371/journal.pgen.1004013>
- 841 Joyce, E.F., McKim, K.S., 2009. *Drosophila* PCH2 is required for a pachytene  
842 checkpoint that monitors double-strand-break-independent events leading to  
843 meiotic crossover formation. Genetics 181, 39–51.  
844 <https://doi.org/10.1534/genetics.108.093112>
- 845 Keeney, S., Giroux, C.N., Kleckner, N., 1997. Meiosis-specific DNA double-strand  
846 breaks are catalyzed by Spo11, a member of a widely conserved protein family.  
847 Cell 88, 375–84.
- 848 Krishnan, B., Thomas, S.E., Yan, R., Yamada, H., Zhulin, I.B., McKee, B.D., 2014.  
849 *Sisters Unbound* Is Required for Meiotic Centromeric Cohesion in *Drosophila*  
850 *melanogaster*. Genetics 198, 947–965.  
851 <https://doi.org/10.1534/genetics.114.166009>
- 852 Lake, C.M., Holsclaw, J.K., Bellendir, S.P., Sekelsky, J., Hawley, R.S., 2013. The  
853 development of a monoclonal antibody recognizing the *Drosophila melanogaster*  
854 phosphorylated histone H2A variant ( $\gamma$ -H2AV). G3 (Bethesda). 3, 1539–43.  
855 <https://doi.org/10.1534/g3.113.006833>
- 856 Lake, C.M., Nielsen, R.J., Guo, F., Unruh, J.R., Slaughter, B.D., Hawley, R.S., 2015.

857 Vilya, a component of the recombination nodule, is required for meiotic double-  
858 strand break formation in *Drosophila*. *Elife* 4. <https://doi.org/10.7554/eLife.08287>

859 Lee, T.C., Kashyap, R.L., Chu, C.N., 1994. Building Skeleton Models via 3-D Medial  
860 Surface Axis Thinning Algorithms. *CVGIP Graph. Model. Image Process.* 56, 462–  
861 478. <https://doi.org/10.1006/CGIP.1994.1042>

862 Libuda, D.E., Uzawa, S., Meyer, B.J., Villeneuve, A.M., 2013. Meiotic chromosome  
863 structures constrain and respond to designation of crossover sites. *Nature* 502,  
864 703–6. <https://doi.org/10.1038/nature12577>

865 Lindsley, D.L., Sandler, L., Counce, S.J., Chandley, A.C., Lewis, K.R., 1977. The  
866 Genetic Analysis of Meiosis in Female *Drosophila melanogaster* [and Discussion].  
867 *Philos. Trans. R. Soc. B Biol. Sci.* 277, 295–312.  
868 <https://doi.org/10.1098/rstb.1977.0019>

869 Lucchesi, J., Ashburner, M., Novitsaki, E., 1976. The genetics and biology of  
870 *Drosophila*.

871 Lupas, A., Dyke, M. Van, Stock, J., 1991. Predicting coiled coils from protein  
872 sequences. *Science (80-. )*. 252, 1162–1164.  
873 <https://doi.org/10.1126/SCIENCE.252.5009.1162>

874 Lupas, A.N., Basser, J., 2017. Coiled Coils - A Model System for the 21st Century.  
875 *Trends Biochem. Sci.* 42, 130–140. <https://doi.org/10.1016/j.tibs.2016.10.007>

876 Maguire, M.P., 1985. Crossover frequencies within paracentric inversions in maize: the  
877 implications for homologue pairing models. *Genet. Res.* 46, 273–8.

878 Maguire, M.P., Riess, R.W., 1994. The relationship of homologous synapsis and  
879 crossing over in a maize inversion. *Genetics* 137, 281–8.

- 880 Manheim, E.A., McKim, K.S., 2003. The Synaptonemal complex component C(2)M  
881 regulates meiotic crossing over in *Drosophila*. *Curr. Biol.* 13, 276–85.
- 882 McKim, K.S., Hayashi-Hagihara, A., 1998. mei-W68 in *Drosophila melanogaster*  
883 encodes a Spo11 homolog: evidence that the mechanism for initiating meiotic  
884 recombination is conserved. *Genes Dev.* 12, 2932–2942.  
885 <https://doi.org/10.1101/gad.12.18.2932>
- 886 Mehrotra, S., McKim, K.S., 2006. Temporal Analysis of Meiotic DNA Double-Strand  
887 Break Formation and Repair in *Drosophila* Females. *PLoS Genet.* 2, e200.  
888 <https://doi.org/10.1371/journal.pgen.0020200>
- 889 Miller, D.E., Smith, C.B., Kazemi, N.Y., Cockrell, A.J., Arvanitakis, A. V., Blumenstiel,  
890 J.P., Jaspersen, S.L., Hawley, R.S., 2016. Whole-Genome Analysis of Individual  
891 Meiotic Events in *Drosophila melanogaster* Reveals That Noncrossover Gene  
892 Conversions Are Insensitive to Interference and the Centromere Effect. *Genetics*  
893 203, 159–171. <https://doi.org/10.1534/genetics.115.186486>
- 894 Miller, D.E., Takeo, S., Nandan, K., Paulson, A., Gogol, M.M., Noll, A.C., Perera,  
895 A.G., Walton, K.N., Gilliland, W.D., Li, H., Staehling, K.K., Blumenstiel, J.P.,  
896 Hawley, R.S., 2012. A Whole-Chromosome Analysis of Meiotic Recombination in  
897 *Drosophila melanogaster*. *G3 (Bethesda)*. 2, 249–60.  
898 <https://doi.org/10.1534/g3.111.001396>
- 899 Mlynarczyk-Evans, S., Villeneuve, A.M., 2017. Time-Course Analysis of Early Meiotic  
900 Prophase Events Informs Mechanisms of Homolog Pairing and Synapsis in  
901 *Caenorhabditis elegans*. *Genetics* 207, 103–114.  
902 <https://doi.org/10.1534/genetics.117.204172>

- 903 Nadarajan, S., Lambert, T.J., Altendorfer, E., Gao, J., Blower, M.D., Waters, J.C.,  
904 Colaiácovo, M.P., 2017. Polo-like kinase-dependent phosphorylation of the  
905 synaptonemal complex protein SYP-4 regulates double-strand break formation  
906 through a negative feedback loop. *Elife* 6. <https://doi.org/10.7554/eLife.23437>
- 907 Nicklas, R.B., 1974. CHROMOSOME SEGREGATION MECHANISMS. *Genetics* 78.
- 908 Page, S., Nielsen, R.J., Teeter, K., Lake, C.M., Ong, S., Wright, K.R., Dean, K.L., Agne,  
909 D., Gilliland, W.D., Hawley, R.S., 2007. A germline clone screen for meiotic  
910 mutants in *Drosophila melanogaster*. *Fly (Austin)*. 1, 172–181.  
911 <https://doi.org/10.4161/fly.4720>
- 912 Page, S.L., Hawley, R.S., 2001. c(3)G encodes a *Drosophila* synaptonemal complex  
913 protein. *Genes Dev.* 15, 3130–43. <https://doi.org/10.1101/gad.935001>
- 914 Page, S.L., Khetani, R.S., Lake, C.M., Nielsen, R.J., Jeffress, J.K., Warren, W.D.,  
915 Bickel, S.E., Hawley, R.S., 2008. corona is required for higher-order assembly of  
916 transverse filaments into full-length synaptonemal complex in *Drosophila* oocytes.  
917 *PLoS Genet.* 4, e1000194. <https://doi.org/10.1371/journal.pgen.1000194>
- 918 Parry, D.M., Sandler, L., 1974. The genetic identification of a heterochromatic segment  
919 on the X chromosome of *Drosophila melanogaster*. *Genetics* 77, 535–9.
- 920 Previato de Almeida, L., Evatt, J.M., Chuong, H.H., Kurdzo, E.L., Eyster, C.A.,  
921 Gladstone, M.N., Gómez-H, L., Llano, E., Meyer, R., Pendas, A.M., Pezza, R.J.,  
922 Dawson, D.S., 2019. Shugoshin protects centromere pairing and promotes  
923 segregation of nonexchange partner chromosomes in meiosis. *Proc. Natl. Acad.*  
924 *Sci.* 201902526. <https://doi.org/10.1073/pnas.1902526116>
- 925 Sato-Carlton, A., Nakamura-Tabuchi, C., Chartrand, S.K., Uchino, T., Carlton, P.M.,

- 926 2017. Phosphorylation of the synaptonemal complex protein SYP-1 promotes  
927 meiotic chromosome segregation. *J. Cell Biol.* jcb.201707161.  
928 <https://doi.org/10.1083/jcb.201707161>
- 929 Sherizen, D., Jang, J.K., Bhagat, R., Kato, N., McKim, K.S., 2005. Meiotic  
930 recombination in *Drosophila* females depends on chromosome continuity between  
931 genetically defined boundaries. *Genetics* 169, 767–81.  
932 <https://doi.org/10.1534/genetics.104.035824>
- 933 Storlazzi, A., Xu, L., Schwacha, A., Kleckner, N., 1996. Synaptonemal complex (SC)  
934 component Zip1 plays a role in meiotic recombination independent of SC  
935 polymerization along the chromosomes. *Proc. Natl. Acad. Sci. U. S. A.* 93, 9043–8.
- 936 Szauter, P., 1984. An analysis of regional constraints on exchange in *Drosophila*  
937 *melanogaster* using recombination-defective meiotic mutants. *Genetics* 106, 45–71.
- 938 Takeo, S., Lake, C.M., Morais-de-Sá, E., Sunkel, C.E., Hawley, R.S., 2011.  
939 Synaptonemal complex-dependent centromeric clustering and the initiation of  
940 synapsis in *Drosophila* oocytes. *Curr. Biol.* 21, 1845–51.  
941 <https://doi.org/10.1016/j.cub.2011.09.044>
- 942 Tanneti, N.S., Landy, K., Joyce, E.F., McKim, K.S., 2011. A Pathway for Synapsis  
943 Initiation during Zygotene in *Drosophila* Oocytes. *Curr. Biol.* 21, 1852–1857.  
944 <https://doi.org/10.1016/j.cub.2011.10.005>
- 945 Tung, K.S., Roeder, G.S., 1998. Meiotic chromosome morphology and behavior in zip1  
946 mutants of *Saccharomyces cerevisiae*. *Genetics* 149, 817–32.
- 947 Voelkel-Meiman, K., Cheng, S.-Y., Morehouse, S.J., MacQueen, A.J., 2016.  
948 Synaptonemal Complex Proteins of Budding Yeast Define Reciprocal Roles in

949 MutSy-Mediated Crossover Formation. *Genetics* 203, 1091–103.  
950 <https://doi.org/10.1534/genetics.115.182923>

951 Wagner, C.R., Kuervers, L., Baillie, D.L., Yanowitz, J.L., 2010. *xnd-1* regulates the  
952 global recombination landscape in *Caenorhabditis elegans*. *Nature* 467, 839–43.  
953 <https://doi.org/10.1038/nature09429>

954 Yan, R., McKee, B.D., 2013. The cohesion protein SOLO associates with SMC1 and is  
955 required for synapsis, recombination, homolog bias and cohesion and pairing of  
956 centromeres in *Drosophila* Meiosis. *PLoS Genet.* 9, e1003637.  
957 <https://doi.org/10.1371/journal.pgen.1003637>

958 Zeng, Y., Li, H., Schweppe, N.M., Hawley, R.S., Gilliland, W.D., 2010. Statistical  
959 Analysis of Nondisjunction Assays in *Drosophila*. *Genetics* 186, 505–513.  
960 <https://doi.org/10.1534/genetics.110.118778>

961 Zickler, D., Kleckner, N., 2015. Recombination, pairing, and synapsis of homologs  
962 during meiosis. *Cold Spring Harb. Perspect. Biol.* 7, a016626.  
963 <https://doi.org/10.1101/cshperspect.a016626>

964 Zickler, D., Kleckner, N., 1999. Meiotic chromosomes: integrating structure and function.  
965 *Annu. Rev. Genet.* 33, 603–754. <https://doi.org/10.1146/annurev.genet.33.1.603>

966 Zitron, A.E., Hawley, R.S., 1989. The genetic analysis of distributive segregation in  
967 *Drosophila melanogaster*. I. Isolation and characterization of Aberrant X  
968 segregation (Axs), a mutation defective in chromosome partner choice. *Genetics*  
969 122, 801–21.  
970  
971

972

973

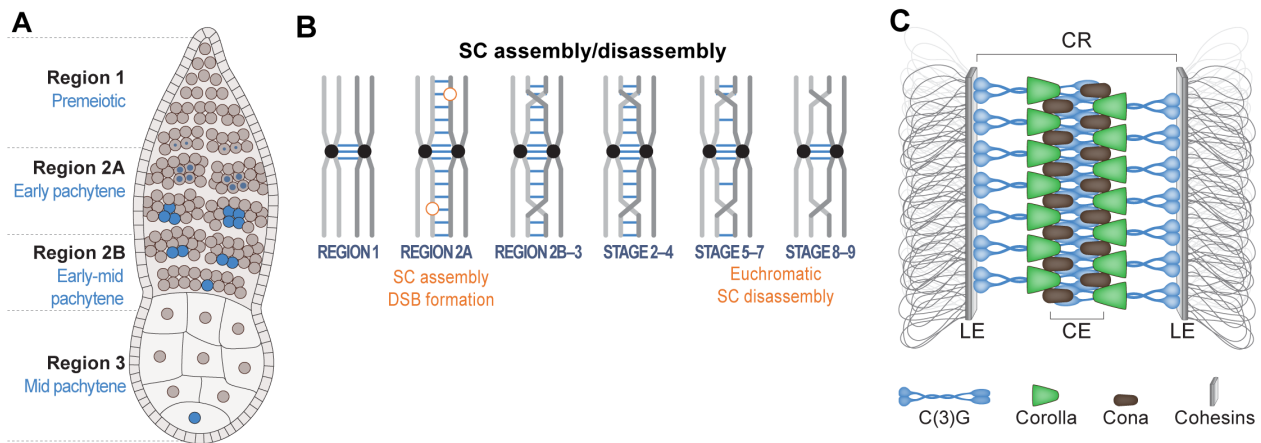

974

975 **Figure 1: Schematic of early meiosis in *Drosophila*.** (A) Diagram of a *Drosophila*  
 976 germarium and SC formation (described in (Hughes et al., 2018)). At the anterior tip of  
 977 the germarium, a germline stem cell divides asymmetrically to give rise to a cystoblast,  
 978 which undergoes four mitotic divisions with incomplete cytokinesis to yield a 16-cell  
 979 cyst. At region 2A (zygotene/early pachytene) up to 4 of the 16 cells in the cyst will enter  
 980 meiosis and assemble the SC (SC represented by blue shading) to fully synapse the  
 981 chromosomes. The oocyte selection process progresses in region 2B and is  
 982 characterized by two nuclei (pro-oocytes) with full-length SC (early-mid pachytene) and  
 983 is completed by region 3 (mid pachytene) with only one oocyte per cyst retaining full-  
 984 length SC and all other nuclei having backed out of the meiotic program to become  
 985 nurse cells. (B) Homologous chromosome pairing and SC assembly begin at the  
 986 centromeres (represented as black dots on the chromosomes) during the mitotic  
 987 divisions in region 1 (Christophorou et al., 2013; Joyce et al., 2013). In region 2A (early  
 988 pachytene) the SC (represented by blue lines) is assembled along the chromosome  
 989 arms and DSBs form (orange circles). The SC is maintained along chromosome arms

990 until stage 5-7 (late pachytene), when SC disassembly occurs at multiple regions along  
991 the chromosome arms. The SC persists at the centromeres into stages 8–9 (mid  
992 prophase)(Takeo et al., 2011; Tanneti et al., 2011). (C) Model of the *Drosophila* SC  
993 showing the transverse filament protein C(3)G (blue), the central region (CR) protein  
994 Corolla (green), the central element protein CONA (black), and the lateral  
995 element/cohesin proteins (grey) connected to chromatin loops (adapted from (Hughes  
996 et al., 2018)).

997

998

999



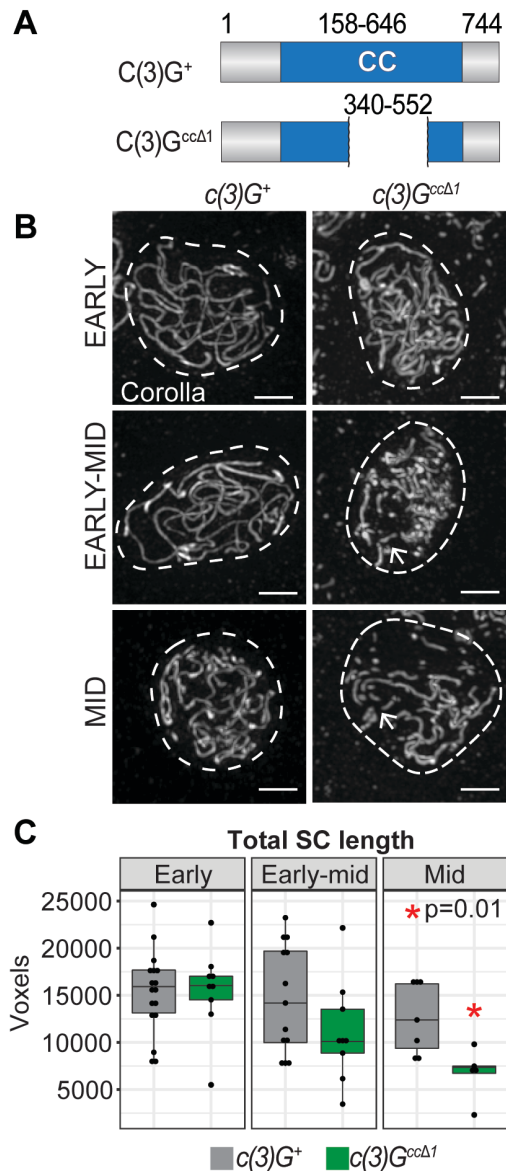

1000

1001 **Figure 2: In-frame deletion of part of the large coiled-coil region of C(3)G leads to**

1002 **a failure to maintain SC.** (A) The *c(3)G<sup>ccΔ1</sup>* deletion removes the amino acids 340–552

1003 from the coiled-coil (CC) domain of C(3)G. The predicted protein CC is in blue (based

1004 on COILs software (Lupas et al., 1991)). (B) Images showing localization of the SC

1005 protein Corolla in *c(3)G+* and *c(3)G<sup>ccΔ1</sup>* nuclei from early pachytene (region 2A) to mid

1006 pachytene (region 3). Dotted lines indicate the location of the nucleus as defined by

1007 DAPI staining (not shown). Arrowheads indicate discontinuities in the SC. Scale bars, 2

1008  $\mu\text{m}$ . (C) Quantification of the total track length of C(3)G-positive SC in nuclei from early,  
1009 early-mid and mid pachytene using skeleton analysis (See Methods). \* $p=0.01$  by t-test,  
1010  $c(3)G^+$ :  $N=17$  (early),  $N=13$  (early-mid), and  $N=7$  (mid);  $c(3)G^{cc\Delta 1}$ :  $N=9$  (early),  $N=9$   
1011 (early-mid), and  $N=5$  (mid).  
1012

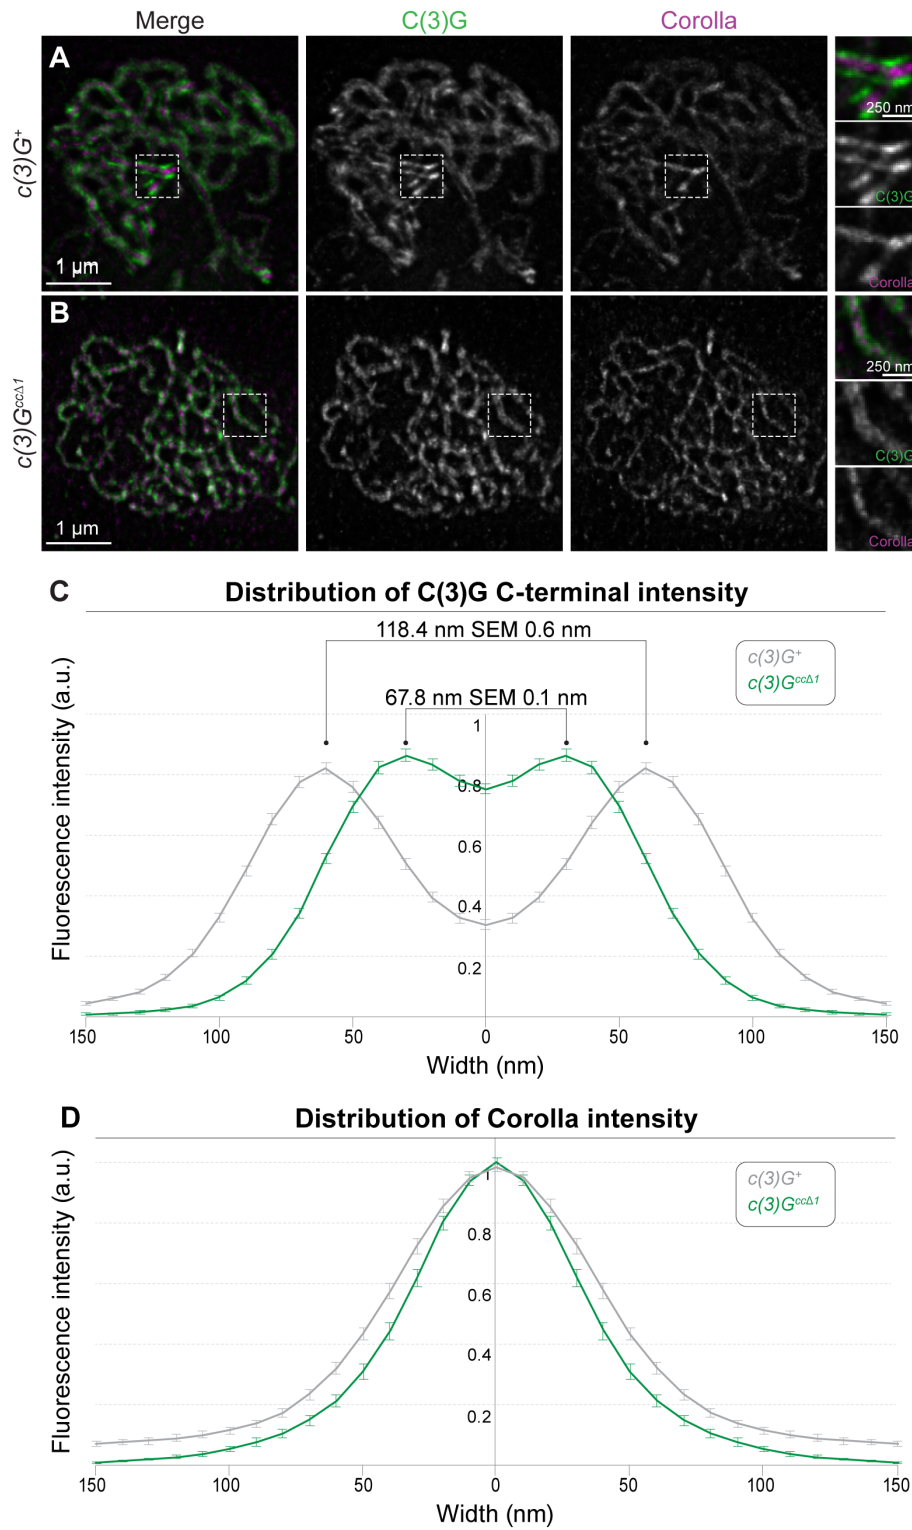

1013

1014 **Figure 2- figure supplement 1: Width of SC is reduced, but the tripartite structure**

1015 **is maintained, in *c(3)G<sup>ccΔ1</sup>* mutants in early pachytene. STED images of early**

1016 pachytene nuclei with the C-terminus of C(3)G (green) and Corolla (magenta) labeled in  
1017  $c(3)G^+$  (A) and  $c(3)G^{cc\Delta 1}$  mutants (B). (C) The average distribution of the distance  
1018 between the two C-terminal C(3)G tracks is shown based on a line profile analysis of  
1019 STED data in each genotype (see Methods). The quantification resulted in an average  
1020 width of  $118.4 \text{ nm} \pm 0.6 \text{ nm}$  (SEM) in wild type and  $67.8 \text{ nm} \pm 0.1 \text{ nm}$  (SEM) in  $c(3)G^{cc\Delta 1}$   
1021 mutants. (D) The average distribution of the Corolla signal based on a line profile  
1022 analysis of STED data in each genotype. The average distribution was generated by  
1023 averaging 46 line profiles from 8 wild type nuclei and 35 line profiles from 12  $c(3)G^{cc\Delta 1}$   
1024 nuclei.  
1025  
1026

1027

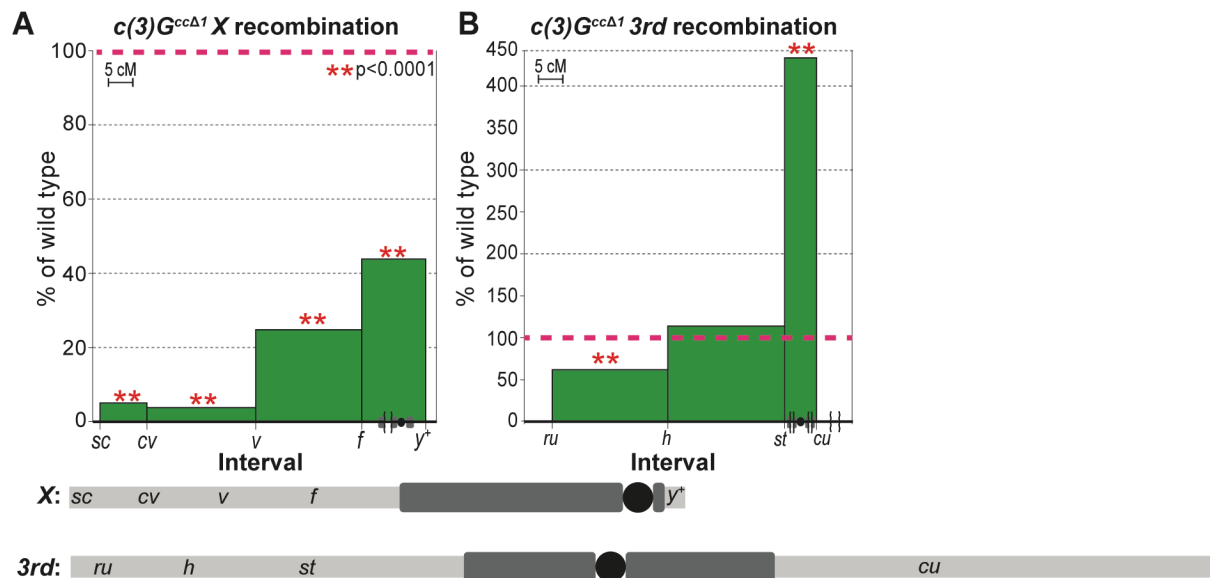

1028

1029

**Figure 3: *c(3)G<sup>ccΔ1</sup>* mutants exhibit chromosome-specific defects in**

1030

**recombination.** Recombination in *c(3)G<sup>ccΔ1</sup>* females on the X chromosome (A) and the

1031

*3rd* chromosome (B) are plotted with percent of wild type on the y-axis vs chromosome

1032

location (in cM) on the x-axis. Brackets along x-axis indicate truncation of that region of

1033

the chromosome. The red dotted line marks wild type levels of recombination and is set

1034

at 100%. P-values obtained using a Fisher's exact test (see Table 1,2 for N values).

1035

See Methods for the recessive markers used to assay recombination. For reference,

1036

below each chart is a diagram of the corresponding chromosome being analyzed

1037

displaying the relative cytological positions of the recombination markers and the

1038

approximate amounts of pericentromeric heterochromatin estimated from (Ashburner et

1039

al., 2005) (the black circle represents the centromere).

1040

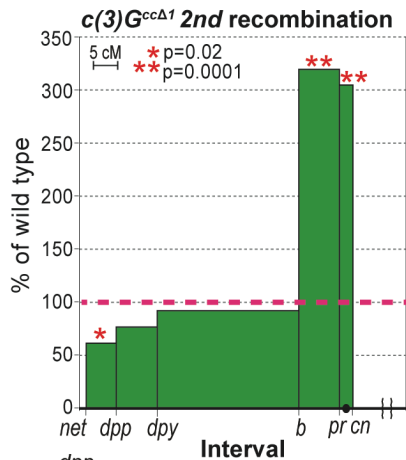

1041

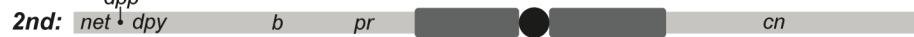

1042

**Figure 3- figure supplement 1: *c(3)G<sup>ccΔ1</sup>* mutants exhibit recombination defects on**

1043

**the 2nd chromosome.** Recombination in *c(3)G<sup>ccΔ1</sup>* mutants on the 2nd chromosome

1044

plotted with percent of wild type on the y-axis vs chromosome location (in cM) on the x-

1045

axis. Brackets along x-axis indicate truncation of that region of the chromosome. The

1046

red dotted line marks wild type levels of recombination and is set to 100%. See Methods

1047

for the recessive markers used to assay recombination. P-values obtained using a

1048

Fisher's exact test (see Table 3 for N values). For reference, below each chart is a

1049

diagram of the corresponding chromosome being analyzed displaying the relative

1050

cytological positions of the recombination markers and the approximate amounts of

1051

pericentromeric heterochromatin estimated from (Ashburner et al., 2005) (the black

1052

circle represents the centromere).

1053

1054

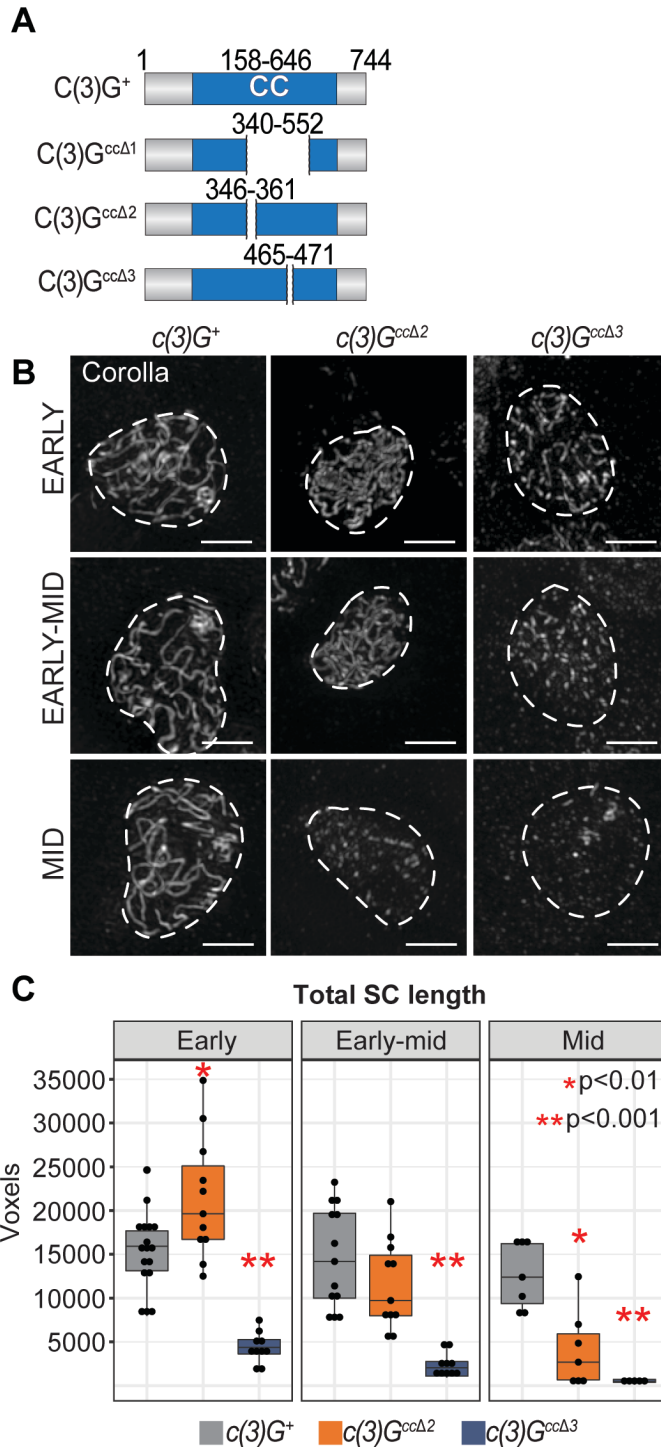

1055

1056

1057

1058

**Figure 4: Two smaller in-frame deletions within the putative  $c(3)G$  coiled-coil region cause varying levels of SC defects.** (A) Diagrams of the  $C(3)G^+$ ,  $C(3)G^{cc\Delta 1}$ ,  $C(3)G^{cc\Delta 2}$  and  $C(3)G^{cc\Delta 3}$  coding regions. (B) Images showing localization of the SC

1059 protein Corolla in  $c(3)G^+$ ,  $c(3)G^{cc\Delta 2}$ , and  $c(3)G^{cc\Delta 3}$  mutants from early pachytene (region  
1060 2A) to mid pachytene (region 3). Dotted lines indicate the location of the nucleus as  
1061 defined by DAPI staining (not shown). Scale bars, 2  $\mu$ m. (C) Quantification of the total  
1062 length of C(3)G positive SC in nuclei from early, early-mid and mid pachytene using  
1063 skeleton analysis (See Methods).  $c(3)G^+$  controls are the same ones used in Fig 2.  
1064 \* $p < .01$  and \*\* $p < .001$  by t-test.  $c(3)G^{cc\Delta 2}$ : N=11 (early), N=11 (early-mid), and N=7 (mid);  
1065  $c(3)G^{cc\Delta 3}$ : N=10 (early), N=10 (early-mid), and N=5 (mid).  
1066



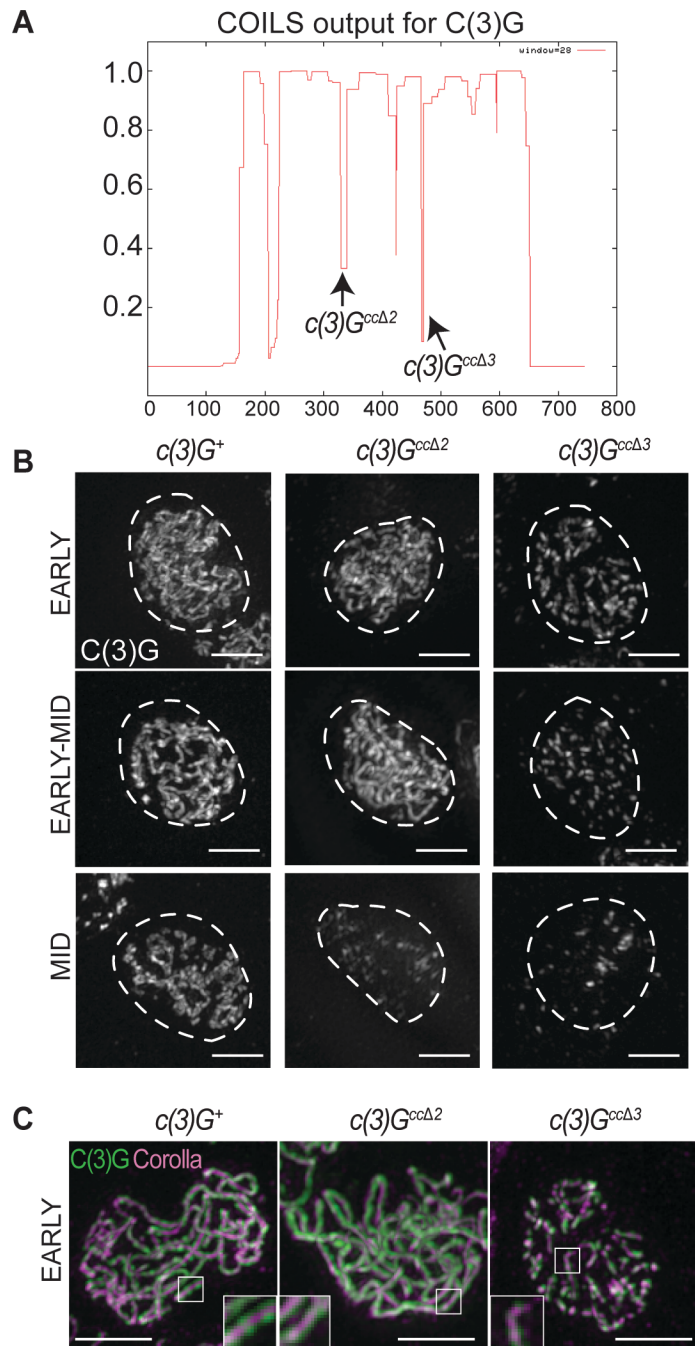

1067

1068 **Figure 4- figure supplement 1: C(3)G is present in  $c(3)G^{cc\Delta 2}$  and  $c(3)G^{cc\Delta 3}$  mutants.**

1069 (A) Diagram of COILS score along the length of C(3)G with arrows where  $c(3)G^{cc\Delta 2}$  and

1070  $c(3)G^{cc\Delta 3}$  deletions were made (Lupas et al., 1991). (B) Images showing localization of

1071 the SC protein C(3)G in wild type,  $c(3)G^{cc\Delta 2}$ , and  $c(3)G^{cc\Delta 3}$  flies from early pachytene

1072 (region 2A) to mid pachytene (region 3). Dotted lines indicate the location of the nucleus

1073 as defined by DAPI staining (not shown). (C) Combined Corolla (magenta) and C(3)G  
1074 (green) staining in early pachytene nuclei show localization of Corolla to the middle of  
1075 C(3)G. Scale bars, 2  $\mu$ m.

1076

1077

1078

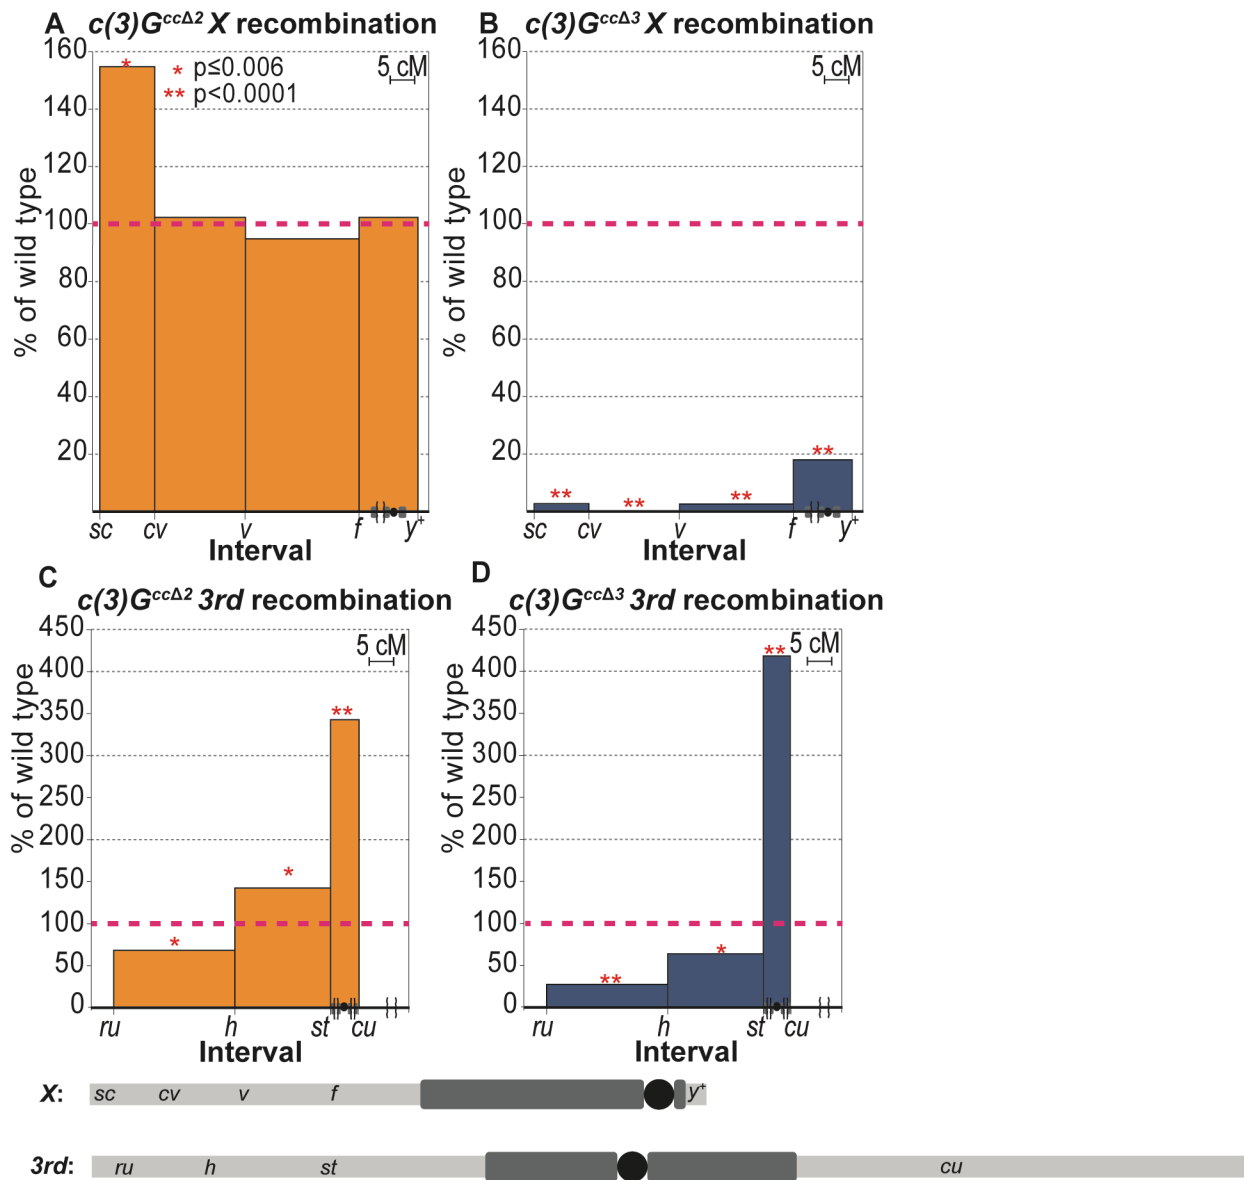

1079

1080 **Figure 5: Loss of SC maintenance in  $c(3)G^{cc\Delta 2}$  mutants in mid pachytene is not**

1081 **sufficient to disrupt X chromosome recombination.** Recombination in  $c(3)G^{cc\Delta 2}$  and

1082  $c(3)G^{cc\Delta 3}$  females on the X chromosome (A,B) and the 3rd chromosome (C,D) are

1083 plotted with percent of wild type on the y-axis vs chromosome location (in cM) on the x-

1084 axis. Brackets along x-axis indicate truncation of that region of the chromosome. The

1085 red dotted line marks wild type levels of recombination and is set at 100%. P-values

1086 obtained using a Fisher's exact test (see Table 1,2 for N values). See Methods for the  
1087 recessive markers used to assay recombination. For reference, below each chart is a  
1088 diagram of the corresponding chromosome being analyzed displaying the relative  
1089 cytological positions of the recombination markers and the approximate amounts of  
1090 pericentromeric heterochromatin estimated from (Ashburner et al., 2005) (the black  
1091 circle represents the centromere).

1092

1093

1094

1095

1096

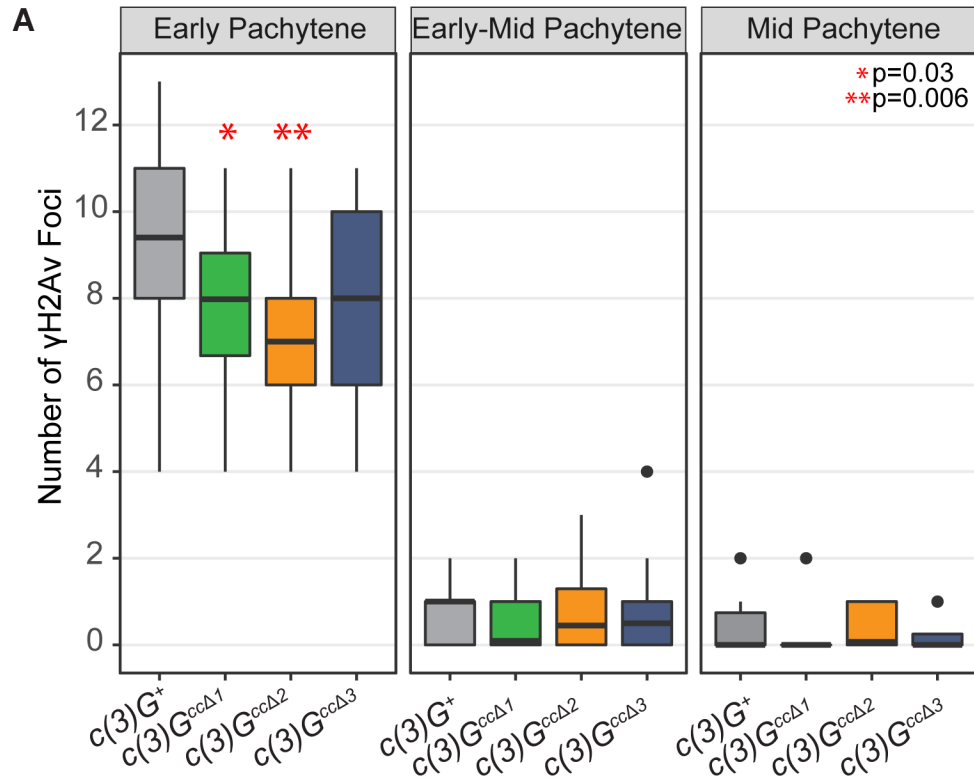

**B**

3rd chromosome recombination frequency

| Genotype                                              | <i>ru-h</i> | <i>h-st</i> | <i>st-cu</i> | total | N   |
|-------------------------------------------------------|-------------|-------------|--------------|-------|-----|
| $c(3)G^+$                                             | 23.0        | 21.7        | 6.1          | 50.9  | 525 |
| $c(3)G^{cc\Delta 3}$                                  | 6.3         | 11.7        | 27.5         | 45.5  | 615 |
| <i>vilya</i> <sup>826</sup> ; +; $c(3)G^{cc\Delta 3}$ | 0.5         | 0.0         | 0.9          | 1.4   | 214 |

1097

1098 **Figure 5- figure supplement 1: DSB levels, as determined by  $\gamma$ H2AV foci number,**  
 1099 **in  $c(3)G^{cc\Delta 1}$ ,  $c(3)G^{cc\Delta 2}$  and  $c(3)G^{cc\Delta 3}$  mutants are similar to wild type.**

1100 (A) Quantification of the number of DSBs per nucleus was determined by counting the  
 1101 number of  $\gamma$ H2AV foci in early, early-mid and mid pachytene of the germarium for  
 1102  $c(3)G^+$ ,  $c(3)G^{cc\Delta 1}$ ,  $c(3)G^{cc\Delta 2}$  and  $c(3)G^{cc\Delta 3}$  flies. N value is  $\geq 10$  nuclei. Statistics were  
 1103 performed using the Mann-Whitney test. (B) 3rd chromosome recombination frequency  
 1104 in  $c(3)G^+$ ,  $c(3)G^{cc\Delta 3}$  and, *vilya*<sup>826</sup>;  $c(3)G^{cc\Delta 3}$  double mutants. Data for  $c(3)G^{cc\Delta 3}$  is the  
 1105 same as shown in Figure 5 and Table 2.

1106

1107

1108

1109

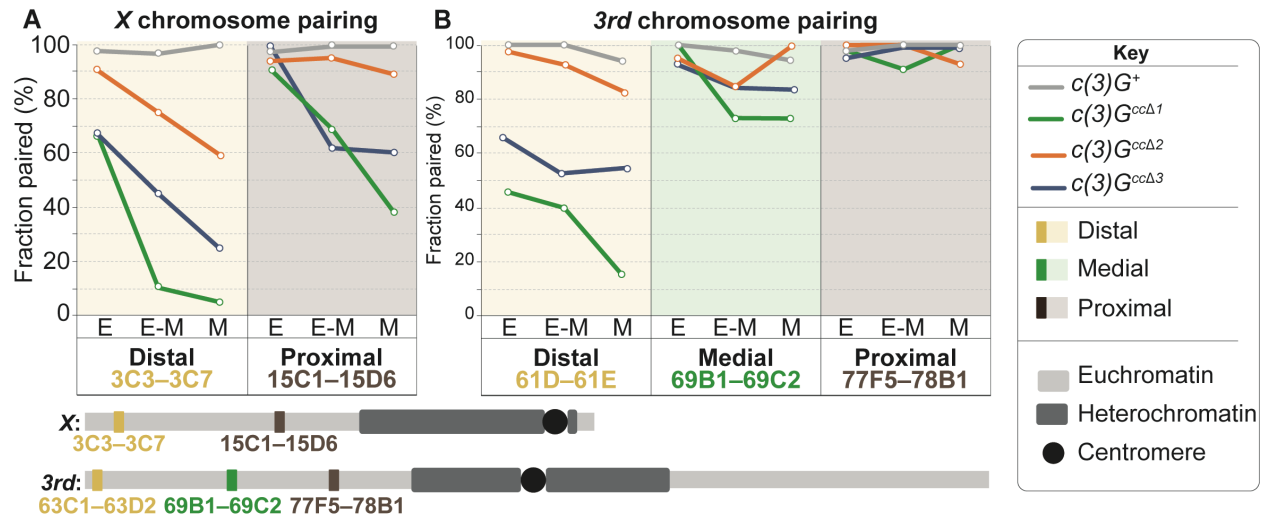

1110

1111 **Figure 6: SC in early to mid pachytene maintains homologous chromosome**

1112 **pairing.** Fraction of paired euchromatic regions in  $c(3)G^+$  controls (grey line),  $c(3)G^{cc\Delta 1}$

1113 (green line),  $c(3)G^{cc\Delta 2}$  (orange line), and  $c(3)G^{cc\Delta 3}$  flies (blue line) assessed by FISH

1114 using BAC probes against either centromere-distal or -proximal regions on the X

1115 chromosome (A) and centromere-distal, -medial or -proximal regions on the 3rd

1116 chromosome (B) at early (E), early-mid (E-M) or mid (M) pachytene. For reference,

1117 below each chart is a diagram of the corresponding chromosome being analyzed (the

1118 black circle represents the centromere). For N-values see Table 5.

1119

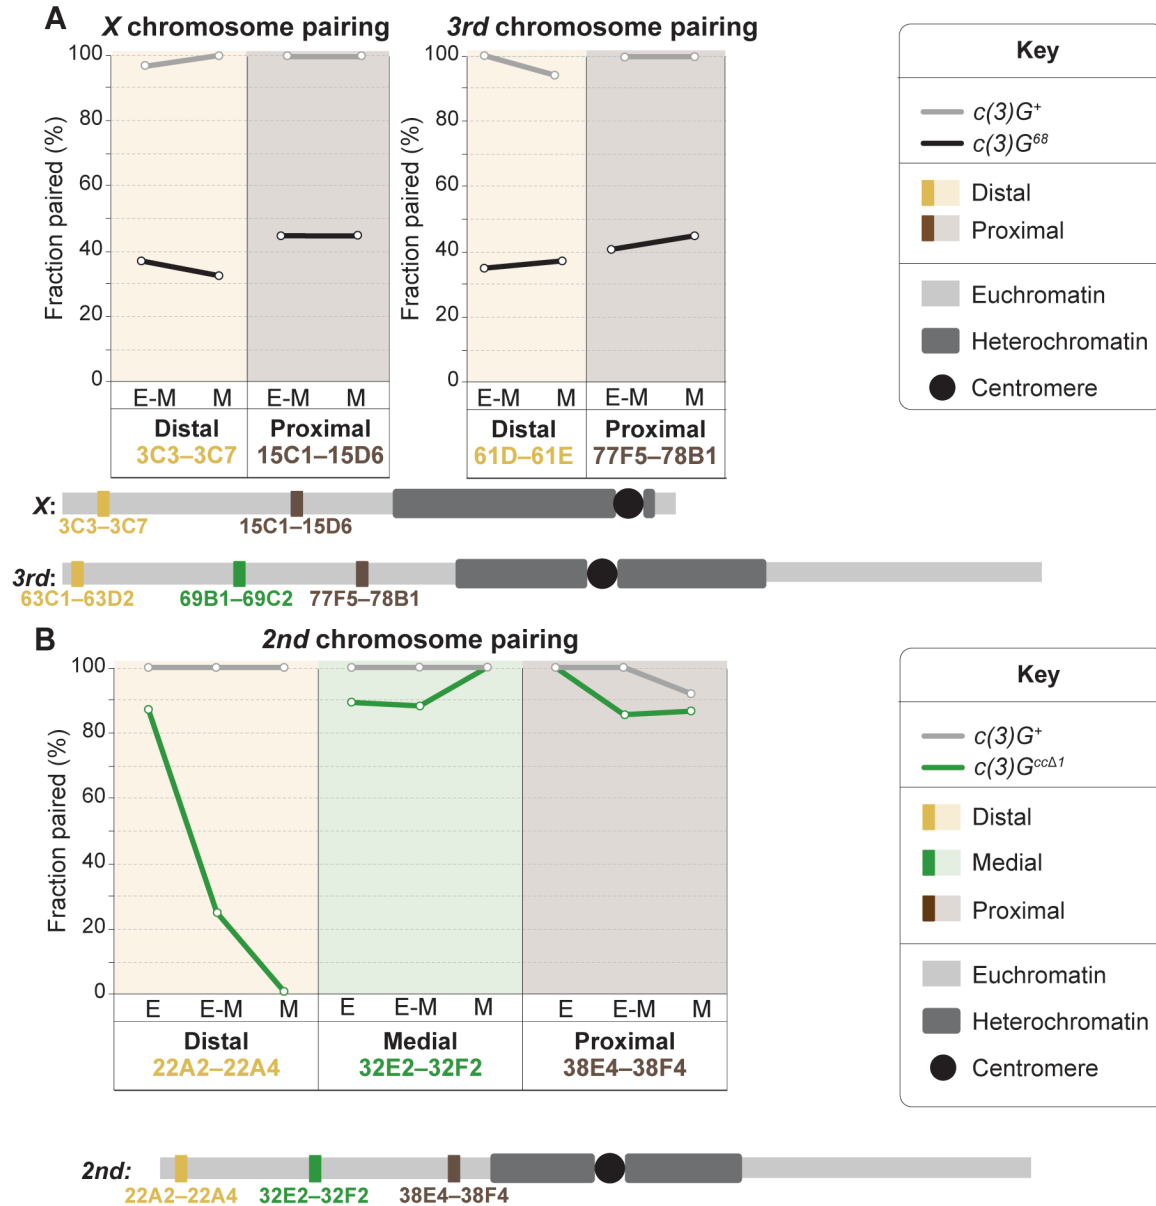

1120

1121 **Figure 6- figure supplement 1: Pairing in  $c(3)G^{68}$  and  $c(3)G^{cc\Delta 1}$  mutants**

1122 (A) Fraction of paired euchromatic regions assessed by FISH using BAC probes against

1123 centromere-distal and proximal regions of the X and 3rd chromosomes in  $c(3)G^{68}$  (black

1124 line) mutants at early-mid (E-M) or mid (M) pachytene.  $c(3)G^+$  control data was

1125 previously presented in Figure 6. (B) Fraction of paired euchromatic regions on the 2nd

1126 chromosome at early (E), early-mid (E-M) or mid (M) pachytene in  $c(3)G^{cc\Delta 1}$  (green line)

1127 mutants compared to  $c(3)G^+$  (grey line) controls. See Table 5 for N values.

1128

1129



1130

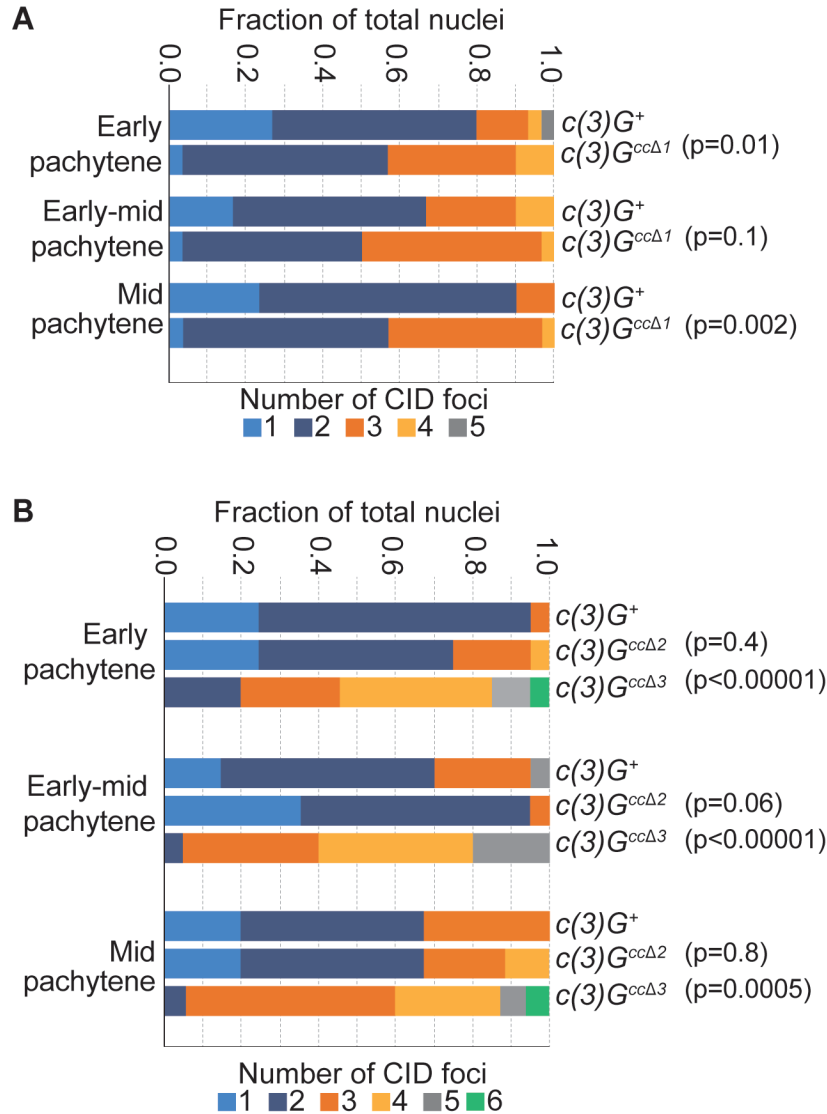

1131

1132 **Figure 6- figure supplement 2: Centromere pairing *c(3)G<sup>ccΔ1</sup>*, *c(3)G<sup>ccΔ2</sup>*, and**  
 1133 ***c(3)G<sup>ccΔ3</sup>* mutants**

1134 Quantification of the number of CID foci per nucleus in wild type, *c(3)G<sup>ccΔ1</sup>*(A), *c(3)G<sup>ccΔ2</sup>*

1135 (B), and *c(3)G<sup>ccΔ3</sup>* mutants (B) from early pachytene (region 2A) to mid pachytene

1136 (region 3) shows no loss of centromere pairing. Statistics were performed using the

1137 Mann-Whitney test. N ≥ 15.

1138

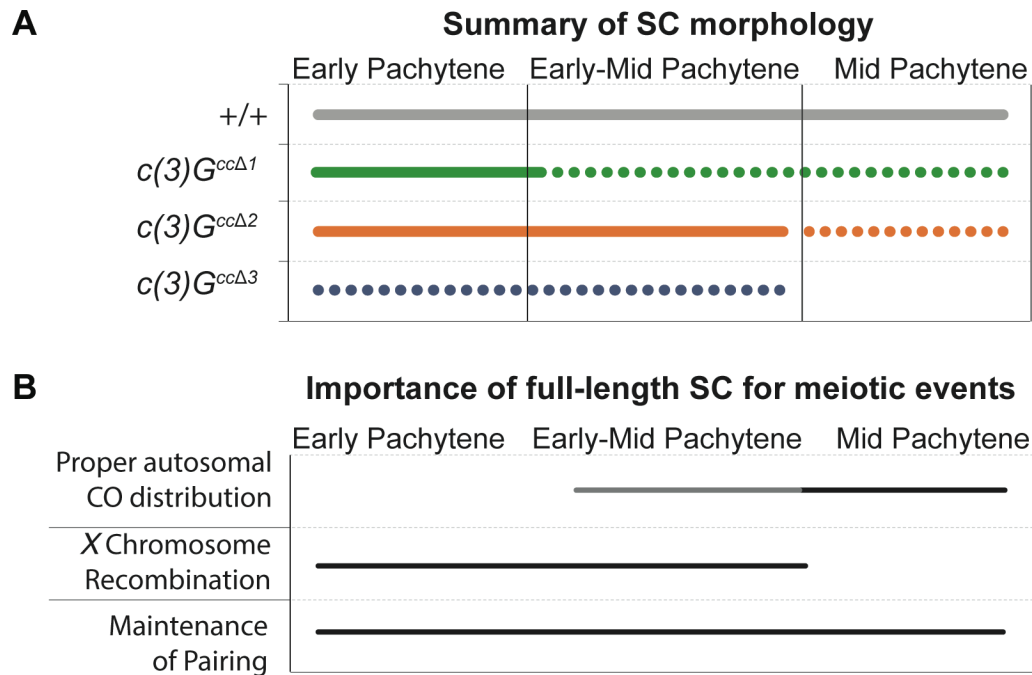

1139

1140 **Figure 7: Summary of SC morphology and model of the requirement for SC in**  
1141 **recombination and pairing maintenance.**

1142 (A) Summary of SC phenotypes in  $c(3)G^+$  (grey line),  $c(3)G^{cc\Delta 1}$  (green line),  $c(3)G^{cc\Delta 2}$   
1143 (orange line) and  $c(3)G^{cc\Delta 3}$  (blue line) flies.  $c(3)G^{cc\Delta 1}$  flies displayed SC defects in early-  
1144 mid pachytene while  $c(3)G^{cc\Delta 2}$  flies lost SC in mid pachytene.  $c(3)G^{cc\Delta 3}$  flies never fully  
1145 assembled SC. Dotted line indicates defects in total SC length and fragmentation (B) A  
1146 model of the requirement of full-length SC (black lines) at different stages of pachytene.  
1147 Based on our data we propose that full-length SC is important for proper autosomal  
1148 crossover placement, X chromosome recombination and maintenance of pairing at  
1149 different stages of early to mid pachytene. The grey line represents a potential role for  
1150 full-length SC that cannot be confirmed with our data.

1151

1152

| Table 1. X Chromosome Recombination      |                       |                                  |                         |                                    |                                   |
|------------------------------------------|-----------------------|----------------------------------|-------------------------|------------------------------------|-----------------------------------|
| Maternal genotype                        | $c(3)G^+$<br>(N=1515) | $c(3)G^{cc\Delta 1}$<br>(N=1420) | $c(3)G^+$<br>(N = 1721) | $c(3)G^{cc\Delta 2}$<br>(N = 1119) | $c(3)G^{cc\Delta 3}$<br>(N = 401) |
| Map Length<br>(% compared to $c(3)G^+$ ) |                       |                                  |                         |                                    |                                   |
| <i>sc-cv</i>                             | 8.8                   | 0.4 (4.5%)                       | 10.6                    | 16.6 (157%)                        | 0.3 (2.8%)                        |
| <i>cv-v</i>                              | 20.7                  | 0.7 (3.4%)                       | 18.1                    | 18.5 (102%)                        | 0.0 (0.0%)                        |
| <i>v-f</i>                               | 21.1                  | 5.2 (24.6%)                      | 21.8                    | 20.7 (95%)                         | 0.5 (2.3%)                        |
| <i>f-y<sup>+</sup></i>                   | 12.4                  | 5.4 (43.5%)                      | 11.2                    | 11.5 (102%)                        | 2.0 (17.9%)                       |
| <b>Total</b>                             | <b>63.0</b>           | <b>11.8 (18.7%)</b>              | <b>61.7</b>             | <b>67.4 (109%)</b>                 | <b>2.8 (4.5%)</b>                 |
| Interference                             |                       |                                  |                         |                                    |                                   |
| <i>sc/cv/v</i>                           | 0.7                   | n/a*                             | 0.5                     | 0.8                                | n/a*                              |
| <i>cv/v/f</i>                            | 0.6                   | n/a*                             | 0.4                     | 0.5                                | n/a*                              |
| Class                                    |                       |                                  |                         |                                    |                                   |
| NCO                                      | 688                   | 1264                             | 812                     | 475                                | 390                               |
| SCO                                      | 703                   | 147                              | 764                     | 537                                | 11                                |
| DCO                                      | 120                   | 7                                | 137                     | 104                                | 0                                 |
| TCO                                      | 4                     | 2                                | 8                       | 3                                  | 0                                 |
| Exchange rank                            |                       |                                  |                         |                                    |                                   |
| $E_0$                                    | 0.067                 | 0.790                            | 0.103                   | 0.034                              | 0.945                             |
| $E_1$                                    | 0.627                 | 0.196                            | 0.597                   | 0.604                              | 0.054                             |
| $E_2$                                    | 0.285                 | 0.003                            | 0.263                   | 0.339                              | 0                                 |
| $E_3$                                    | 0.021                 | 0.011                            | 0.037                   | 0.021                              | 0                                 |

Abbreviations: N, total number of flies scored; NCO, chromatids recovered exhibiting no crossovers; SCO, single-crossover chromatids; DCO, double-crossover chromatids; TCO, triple-crossover chromatids. \*Interference was not calculated unless there were at least 10 DCOs and was not calculated across the centromere.  $c(3)G^+$  is *y w; pol*.

1153  
1154  
1155  
1156  
1157  
1158  
1159  
1160  
1161  
1162  
1163  
1164  
1165  
1166  
1167  
1168  
1169  
1170  
1171  
1172  
1173  
1174  
1175  
1176  
1177

1178  
1179

| Maternal genotype                                       | <i>c(3)G<sup>+</sup></i><br>(N=1014) | <i>c(3)G<sup>ccΔ1</sup></i><br>(N=1385) | <i>c(3)G<sup>+</sup></i><br>(N = 1994) | <i>c(3)G<sup>ccΔ2</sup></i><br>(N = 931) | <i>c(3)G<sup>ccΔ3</sup></i><br>(N = 615) |
|---------------------------------------------------------|--------------------------------------|-----------------------------------------|----------------------------------------|------------------------------------------|------------------------------------------|
| Map Length<br>(% compared to <i>c(3)G<sup>+</sup></i> ) |                                      |                                         |                                        |                                          |                                          |
| <i>ru-h</i>                                             | 22.5                                 | 13.1 (58.2%)                            | 24.7                                   | 16.2 (65.5%)                             | 6.3 (25.5%)                              |
| <i>h-st</i>                                             | 22.4                                 | 24.0 (107%)                             | 18.9                                   | 26.6 (141%)                              | 11.7 (61.9%)                             |
| <i>st-cu</i>                                            | 6.1                                  | 27.3 (447%)                             | 6.8                                    | 23.6 (347%)                              | 27.5 (404%)                              |
| <b>Total</b>                                            | <b>50.9</b>                          | <b>64.4 (126%)</b>                      | <b>50.4</b>                            | <b>66.4 (141%)</b>                       | <b>45.5 (90.3%)</b>                      |
| Interference                                            |                                      |                                         |                                        |                                          |                                          |
| <i>ru/h/st</i>                                          | 0.7                                  | 0.5                                     | 0.8                                    | 0.6                                      | n/a*                                     |
| Class                                                   |                                      |                                         |                                        |                                          |                                          |
| NCO                                                     | 546                                  | 675                                     | 1069                                   | 418                                      | 377                                      |
| SCO                                                     | 421                                  | 535                                     | 842                                    | 411                                      | 199                                      |
| DCO                                                     | 45                                   | 167                                     | 83                                     | 99                                       | 36                                       |
| TCO                                                     | 2                                    | 8                                       | 0                                      | 3                                        | 3                                        |
| Exchange rank                                           |                                      |                                         |                                        |                                          |                                          |
| <i>E</i> <sub>0</sub>                                   | 0.165                                | 0.202                                   | 0.155                                  | 0.111                                    | 0.343                                    |
| <i>E</i> <sub>1</sub>                                   | 0.665                                | 0.420                                   | 0.678                                  | 0.477                                    | 0.442                                    |
| <i>E</i> <sub>2</sub>                                   | 0.154                                | 0.345                                   | 0.166                                  | 0.387                                    | 0.176                                    |
| <i>E</i> <sub>3</sub>                                   | 0.016                                | 0.032                                   | 0.000                                  | 0.026                                    | 0.039                                    |

1180 Abbreviations: N, total number of flies scored; NCO, chromatids recovered exhibiting no  
1181 crossovers; SCO, single-crossover chromatids; DCO, double-crossover chromatids; TCO, triple-  
1182 crossover chromatids. \*Interference was not calculated unless there were at least 10 DCOs in  
1183 those intervals and was not calculated across the centromere. *c(3)G<sup>+</sup>* is *y w; pol*.

1184  
1185  
1186  
1187

| <b>Table 3. 2<sup>nd</sup> Chromosome Recombination</b> |                          |                             |
|---------------------------------------------------------|--------------------------|-----------------------------|
| Maternal genotype                                       | <i>c(3)G<sup>+</sup></i> | <i>c(3)G<sup>ccΔ1</sup></i> |
|                                                         | (N = 2376)               | (N = 1456)                  |
| Map Length<br>(% compared to <i>c(3)G<sup>+</sup></i> ) |                          |                             |
| <i>net-dpp</i>                                          | 5.7                      | 3.4 (59.6%)                 |
| <i>dpp-dpy</i>                                          | 8.0                      | 5.8 (72.5%)                 |
| <i>dpy-b</i>                                            | 28.5                     | 26.9 (94.4%)                |
| <i>b-pr</i>                                             | 7.8                      | 24.9 (319%)                 |
| <i>pr-cn</i>                                            | 2.2                      | 6.7 (304%)                  |
| <b>Total</b>                                            | <b>52.2</b>              | <b>67.6 (129%)</b>          |
| <i>net/dpp/dpy</i>                                      | 0.3                      | 0.8                         |
| <i>dpp/dpy/b</i>                                        | 0.6                      | 0.8                         |
| <i>dpy/b/pr</i>                                         | 0.6                      | -0.2                        |
| NCO                                                     | 1249                     | 624                         |
| SCO                                                     | 1021                     | 692                         |
| DCO                                                     | 98                       | 128                         |
| TCO                                                     | 8                        | 12                          |
| <i>E</i> <sub>0</sub>                                   | 0.134                    | 0.033                       |
| <i>E</i> <sub>1</sub>                                   | 0.715                    | 0.648                       |
| <i>E</i> <sub>2</sub>                                   | 0.125                    | 0.253                       |
| <i>E</i> <sub>3</sub>                                   | 0.027                    | 0.066                       |

1188 Abbreviations: N, total number of flies scored; NCO,  
1189 chromatids recovered exhibiting no crossovers; SCO, single-  
1190 crossover chromatids; DCO, double-crossover chromatids;  
1191 TCO, triple-crossover chromatids. \*Interference was not  
1192 calculated unless there were at least 10 DCOs and was not  
1193 calculated across the centromere. *c(3)G<sup>+</sup>* is *y w; pol*.  
1194  
1195  
1196  
1197  
1198  
1199  
1200  
1201  
1202  
1203  
1204  
1205  
1206  
1207  
1208  
1209  
1210  
1211  
1212  
1213  
1214  
1215

1216  
1217

| <b>Table 4. X and 4<sup>th</sup> Chromosome Nondisjunction</b> |                                      |                                        |                                        |                                           |                                          |
|----------------------------------------------------------------|--------------------------------------|----------------------------------------|----------------------------------------|-------------------------------------------|------------------------------------------|
| Maternal genotype                                              | <i>c(3)G<sup>+</sup></i><br>(N=1348) | <i>c(3)G<sup>ccΔ1</sup></i><br>(N=954) | <i>c(3)G<sup>+</sup></i><br>(N = 1157) | <i>c(3)G<sup>ccΔ2</sup></i><br>(N = 2422) | <i>c(3)G<sup>ccΔ3</sup></i><br>(N = 837) |
| Percent nondisjunction<br>(p value)                            |                                      |                                        |                                        |                                           |                                          |
| X                                                              | 0.7                                  | 1.5                                    | 1.0                                    | 0.5                                       | 4.5*                                     |
| 4 <sup>th</sup>                                                | 0.4                                  | 0.6                                    | 0.1                                    | 0.1                                       | 2.0*                                     |

1218  
1219 Rate of X and 4<sup>th</sup> nondisjunction in *c(3)G<sup>+</sup>*, *c(3)G<sup>ccΔ1</sup>*, *c(3)G<sup>ccΔ2</sup>*, and *c(3)G<sup>ccΔ3</sup>* females.  
1220 Significance calculated as described in (Zeng et al., 2010). Adjusted n accounts for the  
1221 inviable progeny class plus the scored progeny. \**c(3)G<sup>ccΔ3</sup>* females display elevated rates of  
1222 both X (p < .001) and 4<sup>th</sup> (p<.001) nondisjunction when compared to *c(3)G<sup>+</sup>* controls;  
1223 however the number of flies scored is not sufficient to determine significance.  
1224  
1225

**Table 5. Summary of X and 3<sup>rd</sup> chromosome pairing**

| Maternal genotype               | <i>c(3)G<sup>+</sup></i> | <i>c(3)G<sup>ccΔ1</sup></i> | <i>c(3)G<sup>ccΔ2</sup></i> | <i>c(3)G<sup>ccΔ3</sup></i> | <i>c(3)G<sup>68</sup></i> |
|---------------------------------|--------------------------|-----------------------------|-----------------------------|-----------------------------|---------------------------|
| Percent paired<br>(N value)     |                          |                             |                             |                             |                           |
| <i>X proximal (3C3-3C7)</i>     |                          |                             |                             |                             |                           |
| Early                           | 97.1(70)                 | 67.9(28)                    | 90.9(33)                    | 68.8(16)                    | n/a                       |
| Early-mid                       | 96.6(60)                 | 10.7(28)                    | 75(20)                      | 45(20)                      | 37(27)                    |
| Mid                             | 100(24)                  | 5.3(19)                     | 58.8(17)                    | 26.3(19)                    | 36.8(19)                  |
| <i>X distal (15C1-15D6)</i>     |                          |                             |                             |                             |                           |
| Early                           | 97.4(79)                 | 90.6(32)                    | 93.9(33)                    | 100(17)                     | n/a                       |
| Early-mid                       | 100(69)                  | 69(29)                      | 95(20)                      | 62.5(16)                    | 50(18)                    |
| Mid                             | 100(28)                  | 38.5(13)                    | 88.2(17)                    | 60(15)                      | 53(15)                    |
| <i>2nd proximal (22A2-22A4)</i> |                          |                             |                             |                             |                           |
| Early                           | 100(21)                  | 87.5(24)                    | n/a                         | n/a                         | n/a                       |
| Early-mid                       | 100(20)                  | 25(20)                      | n/a                         | n/a                         | n/a                       |
| Mid                             | 100(13)                  | 1(9)                        | n/a                         | n/a                         | n/a                       |
| <i>2nd medial (32E2-32F2)</i>   |                          |                             |                             |                             |                           |
| Early                           | 100(21)                  | 89.7(29)                    | n/a                         | n/a                         | n/a                       |
| Early-mid                       | 100(15)                  | 88.2(17)                    | n/a                         | n/a                         | n/a                       |
| Mid                             | 100(8)                   | 100(7)                      | n/a                         | n/a                         | n/a                       |
| <i>2nd distal (38E4-38F4)</i>   |                          |                             |                             |                             |                           |
| Early                           | 100(25)                  | 100(37)                     | n/a                         | n/a                         | n/a                       |
| Early-mid                       | 100(23)                  | 85.7(28)                    | n/a                         | n/a                         | n/a                       |
| Mid                             | 92.3(13)                 | 86.7(15)                    | n/a                         | n/a                         | n/a                       |
| <i>3rd proximal (61D-61E)</i>   |                          |                             |                             |                             |                           |
| Early                           | 100(36)                  | 45.8(24)                    | 97.6(41)                    | 68.4(19)                    | n/a                       |
| Early-mid                       | 100(32)                  | 40(20)                      | 92.9(28)                    | 52.6(19)                    | 29.2(24)                  |
| Mid                             | 93.8(16)                 | 15.4(13)                    | 83.3(24)                    | 56.3(16)                    | 40(15)                    |
| <i>3rd medial (69B1-69C2)</i>   |                          |                             |                             |                             |                           |
| Early                           | 100(46)                  | 100(33)                     | 95.5(22)                    | 93.3(30)                    | n/a                       |
| Early-mid                       | 97.6(43)                 | 73.1(26)                    | 85.7(14)                    | 86.7(15)                    | n/a                       |
| Mid                             | 94.4(18)                 | 73.6(19)                    | 100(9)                      | 84(25)                      | n/a                       |
| <i>3rd distal (77F5-78B1)</i>   |                          |                             |                             |                             |                           |
| Early                           | 98.2(56)                 | 98.1(54)                    | 100(21)                     | 96(25)                      | n/a                       |
| Early-mid                       | 100(50)                  | 90.9(33)                    | 100(15)                     | 100(17)                     | 41.6(24)                  |
| Mid                             | 100(20)                  | 100(17)                     | 93.8(16)                    | 100(18)                     | 50(16)                    |

1226

1227

1228

1229

1230

1231

1232

1233 **Key Resource Table**

| RESOURCE/ REAGENT                                   | SOURCE                                                 | IDENTIFIER                    |
|-----------------------------------------------------|--------------------------------------------------------|-------------------------------|
| <b>Antibodies</b>                                   |                                                        |                               |
| C(3)G mouse C-terminal monoclonals                  | Hawley Lab                                             | 1A8-1G2<br>5G4-1F1<br>1G5-2F7 |
| Corolla rabbit                                      | Hawley Lab                                             | AP-Corolla                    |
| CID rat                                             | Gift from Claudio Sunkel                               |                               |
| CID rat                                             | Hawley Lab                                             |                               |
| yH2AV mouse                                         | Iowa Hybridoma Bank                                    | UNC93-5.2.1                   |
| Alexa Fluor 488 goat anti-mouse                     | ThermoFisher                                           | A11001                        |
| Alexa Fluor 555 goat anti-mouse                     | ThermoFisher                                           | A21422                        |
| Alexa Fluor 647 goat anti-mouse                     | ThermoFisher                                           | A21235                        |
| Alexa Fluor 488 goat anti-rabbit                    | ThermoFisher                                           | A11008                        |
| Alexa Fluor 555 goat anti-rabbit                    | ThermoFisher                                           | A21428                        |
| Alexa Fluor 555 goat anti-rat                       | ThermoFisher                                           | A21434                        |
| Alexa Fluor 647 goat anti-rat                       | ThermoFisher                                           | A21247                        |
| <b>Bacterial Strains</b>                            |                                                        |                               |
| TOP10 chemically competent cells                    | ThermoFisher                                           | C404003                       |
| Drosophila BAC RP98-28O9 (polytene band 22A2-22A4)  | Children's Hospital Oakland Research Institute (CHORI) | RP98-28O9                     |
| Drosophila BAC RP98-43K24 (polytene band 32E2-32F2) | CHORI                                                  | RP98-43K24                    |
| Drosophila BAC RP98-7D17 (polytene band 38E4-38F4)  | CHORI                                                  | RP98-7D17                     |
| Drosophila BAC RP98-2N23 (polytene band 61D-61E)    | CHORI                                                  | RP98-2N23                     |
| Drosophila BAC RP98-26C20 (polytene band 69B1-69C2) | CHORI                                                  | RP98-26C20                    |
| Drosophila BAC RP98-3J2 (polytene band 77F5-78B1)   | CHORI                                                  | RP98-3J2                      |
| Drosophila BAC RP98-3D13 (polytene band 3C3-3C7)    | CHORI                                                  | RP98-3D13                     |
| Drosophila BAC RP98-9H1 (polytene band 15C1-15D6)   | CHORI                                                  | RP98-9H1                      |
| <b>Chemicals and Reagents</b>                       |                                                        |                               |
| AarI restriction enzyme                             | ThermoFisher                                           | ER1581                        |
| SapI restriction enzyme (also known as LgI)         | ThermoFisher                                           | ER1931                        |
| Antarctic phosphatase                               | New England Biolabs                                    | M0289S                        |
| T4 DNA ligase                                       | New England Biolabs                                    | M0202S                        |
| BbsI restriction enzyme                             | New England Biolabs                                    | R0539S                        |



|                                                              |                                        |                                                                                                                                    |
|--------------------------------------------------------------|----------------------------------------|------------------------------------------------------------------------------------------------------------------------------------|
| Alul restriction enzyme                                      | New England Biolabs                    | R0137S                                                                                                                             |
| HaeIII restriction enzyme                                    | New England Biolabs                    | R0107S                                                                                                                             |
| MseI restriction enzyme                                      | New England Biolabs                    | R0525S                                                                                                                             |
| RsaI restriction enzyme                                      | New England Biolabs                    | R0167S                                                                                                                             |
| SpeI restriction enzyme                                      | New England Biolabs                    | R0133S                                                                                                                             |
| NdeI restriction enzyme                                      | New England Biolabs                    | R0111S                                                                                                                             |
| MboI restriction enzyme                                      | New England Biolabs                    | R0147S                                                                                                                             |
| MspI restriction enzyme                                      | New England Biolabs                    | R0106S                                                                                                                             |
| Nonidet-P40                                                  | Sigma-Aldrich                          | 11332473001                                                                                                                        |
| 16% Formaldehyde                                             | Electron Microscopy Sciences           | 15710                                                                                                                              |
| Prolong Gold                                                 | Life Technologies                      | P36930                                                                                                                             |
| 2,2-thiodiethanol (TDE)                                      | VWR                                    | 700008-210                                                                                                                         |
| VECTASHIELD                                                  | VWR                                    | 101098-042                                                                                                                         |
| Glycogen                                                     | ThermoFisher                           | 10814010                                                                                                                           |
| <b>Critical Commercial Assays</b>                            |                                        |                                                                                                                                    |
| Quik Change II XL Site-Directed Mutagenesis Kit              | Stratagene/Agilent Technologies        | 200521                                                                                                                             |
| Zero Blunt TOPO Kit                                          | ThermoFisher                           | 451245                                                                                                                             |
| NEBuilder HiFi DNA Kit                                       | New England Biolabs                    | E5520S                                                                                                                             |
| Illustra GenomiPhi V2 DNA Amplification Kit                  | GE Healthcare                          | GE 25-660-30                                                                                                                       |
| ULYSIS AF647 Nucleic Acid Labeling Kit                       | ThermoFisher                           | U21660                                                                                                                             |
| ULYSIS AF546 Nucleic Acid Labeling Kit                       | ThermoFisher                           | U21652                                                                                                                             |
| Centri-Sep Columns                                           | Princeton Separation                   | CS-900                                                                                                                             |
| Qubit dsDNA HS assay kit                                     | ThermoFisher                           | Q32851                                                                                                                             |
| QIAGEN Plasmid Midi Kit                                      | QIAGEN                                 | 12143                                                                                                                              |
| <b>Deposited Data</b>                                        |                                        |                                                                                                                                    |
| Stowers Original Data Repository (ODR)                       | Stowers Institute for Medical Research | <a href="http://www.stowers.org/research/publications/odr">http://www.stowers.org/research/publications/odr</a>                    |
| Stowers ImageJ Custom Plugins                                | Stowers Institute for Medical Research | <a href="http://research.stowers.org/imagejplugins/zipped_plugins.html">research.stowers.org/imagejplugins/zipped_plugins.html</a> |
| <b>Experimental Model: Drosophila stocks used</b>            |                                        |                                                                                                                                    |
| <i>y w; +/+; +/+; sv<sup>spa-pol</sup></i>                   | Hawley Lab                             | Wild Type (WT)                                                                                                                     |
| <i>y w/Y<sup>+</sup>y; Sp/SM1; sv<sup>spa-pol</sup></i>      | Hawley Lab                             |                                                                                                                                    |
| <i>FM7w; sv<sup>spa-pol</sup></i>                            | Hawley Lab                             |                                                                                                                                    |
| <i>y w/Y<sup>+</sup>y; Pr/TM3; sv<sup>spa-pol</sup></i>      | Hawley Lab                             |                                                                                                                                    |
| <i>FM7w/sc cv v f y<sup>+</sup>; D/TM3</i>                   | Hawley Lab                             |                                                                                                                                    |
| <i>y m{VASA-Cas9-3xGFP}ZH-2A-3xRFP w<sup>1118</sup>/FM7c</i> | Bloomington Stock Center               | BLM 51323                                                                                                                          |
| <i>y w; nosCas9</i>                                          | Bestgene                               |                                                                                                                                    |
| <i>y w; c(3)G<sup>ccΔ1</sup>ca/TM3; sv<sup>spa-pol</sup></i> | Hawley Lab                             |                                                                                                                                    |

|                                                                                                   |                  |                                                                                |
|---------------------------------------------------------------------------------------------------|------------------|--------------------------------------------------------------------------------|
| <i>y w/w<sup>+</sup>; ru h th st cu c(3)G<sup>ccΔ1</sup>ca/TM3; sv<sup>spa-pol</sup>/+</i>        | Hawley Lab       |                                                                                |
| <i>yw; ru h th st cu c(3)G<sup>ccΔ1</sup>/TM3; pol</i>                                            | Hawley Lab       |                                                                                |
| <i>yw; +/CyO; ru h th st cu c(3)G<sup>ccΔ1</sup>ca/TM3</i>                                        | Hawley Lab       |                                                                                |
| <i>y w; c(3)G<sup>ccΔ2</sup>ca/TM3; sv<sup>spa-pol</sup></i>                                      |                  |                                                                                |
| <i>yw; ru h th st cu c(3)G<sup>ccΔ2</sup>/TM3; pol</i>                                            |                  |                                                                                |
| <i>y w; c(3)G<sup>ccΔ3</sup>ca/TM3; sv<sup>spa-pol</sup></i>                                      |                  |                                                                                |
| <i>yw; ru h th st cu c(3)G<sup>ccΔ3</sup>/TM3; pol</i>                                            |                  |                                                                                |
| <i>net dpp dpy b pr cn</i>                                                                        | Hawley Lab       |                                                                                |
| <i>ru h th st cu sr e ca</i>                                                                      | Hawley Lab       | KAC81                                                                          |
| <i>attached-XY, y<sup>+</sup> v f B; C(4)RM, ci ey<sup>R</sup></i>                                | Hawley Lab       | AD1                                                                            |
| <i>sc cv v f y<sup>+</sup>/Bar[S]Y</i>                                                            | Hawley Lab       | U106                                                                           |
| <i>w<sup>1118</sup>; In(2LR)Gla, wg<sup>Gla-1</sup>/CyO; Herm{3xP3-ECFP, atub-piggyBack10}M10</i> | BLM 32073        | Transposase                                                                    |
| <b>Oligonucleotides</b>                                                                           |                  |                                                                                |
| tataCACCTGCattaCCGAcgctagtggtccttaga gttcag                                                       | Ordered from IDT | Forward primer to PCR Aarl C(3)G fragment <i>c(3)G<sup>ccΔ1</sup></i> (ckc102) |
| gcagCACCTGCgcggTTAAtgaaaaagaattata agtcttaccattaggttacc                                           | Ordered from IDT | Reverse primer to PCR Aarl C(3)G fragment <i>c(3)G<sup>ccΔ1</sup></i> (ckc103) |
| gccgGCTCTTCNTAAcctttttctacaaaatgatttatt                                                           | Ordered from IDT | Forward primer to PCR SapI C(3)G fragment <i>c(3)G<sup>ccΔ1</sup></i> (ckc104) |
| gtatGCTCTTCNCGGtcatcaaaacatagtttagtat cg                                                          | Ordered from IDT | Reverse primer to PCR SapI C(3)G fragment <i>c(3)G<sup>ccΔ1</sup></i> (ckc105) |
| CTTCGAAAGCTTTGTTGGCCTCTAT                                                                         | Ordered from IDT | Sense primer for gRNA plasmid <i>c(3)G<sup>ccΔ1</sup></i> (ckc113)             |
| AAACATAGAGGCCAACAAAGCTTTC                                                                         | Ordered from IDT | Antisense primer for gRNA plasmid <i>c(3)G<sup>ccΔ1</sup></i> (ckc114)         |
| CTTCGCTCAATGCGATCTTCAAGCTGG                                                                       | Ordered from IDT | Sense primer for gRNA plasmid <i>c(3)G<sup>ccΔ2</sup></i>                      |
| AAACCCAGCTTGAAGATCGCATTGAGC                                                                       | Ordered from IDT | Anti-sense primer for gRNA plasmid <i>c(3)G<sup>ccΔ2</sup></i>                 |
| CTTCGATTGACTGATCAGGCAACGAGG                                                                       | Ordered from IDT | Sense primer for gRNA plasmid <i>c(3)G<sup>ccΔ2</sup></i>                      |

|                                |                                                                                                                                     |                                                                |
|--------------------------------|-------------------------------------------------------------------------------------------------------------------------------------|----------------------------------------------------------------|
| AAACCCTCGTTGCCTGATCAGTCAATC    | Ordered from IDT                                                                                                                    | Anti-sense primer for gRNA plasmid <i>c(3)G<sup>ccΔ2</sup></i> |
| CTTCGCTCTTCCTGATTGCTGCGATGG    | Ordered from IDT                                                                                                                    | Sense primer for gRNA plasmid <i>c(3)G<sup>ccΔ3</sup></i>      |
| AAACTCGCAGCAATCAGGAAGAGC       | Ordered from IDT                                                                                                                    | Anti-sense primer for gRNA plasmid <i>c(3)G<sup>ccΔ3</sup></i> |
| CTTCTCTTGAACAACAATCTGTCAAGG    | Ordered from IDT                                                                                                                    | Sense primer for gRNA plasmid <i>c(3)G<sup>ccΔ3</sup></i>      |
| AAACTGACAGATTGTTGTTCAAGAC      | Ordered from IDT                                                                                                                    | Anti-sense primer for gRNA plasmid <i>c(3)G<sup>ccΔ3</sup></i> |
| gggttacactggcttcctt            | Ordered from IDT                                                                                                                    | Genotyping primer for <i>c(3)G<sup>ccΔ3</sup></i>              |
| ctgagactgtaattcctcgctaaa       | Ordered from IDT                                                                                                                    | Genotyping primer for <i>c(3)G<sup>ccΔ3</sup></i>              |
| accaacctcgtaggcatctg           | Ordered from IDT                                                                                                                    | Genotyping primer for <i>c(3)G<sup>ccΔ2</sup></i>              |
| GTTGAGAAGAAAAATTCAGAGCTCCG     | Ordered from IDT                                                                                                                    | Genotyping primer for <i>c(3)G<sup>ccΔ2</sup></i>              |
| <b>Recombinant DNA</b>         |                                                                                                                                     |                                                                |
| pU6-BbsI-chiRNA-X204upstream   | Vector backbone from Addgene                                                                                                        | ID:45946                                                       |
| pHD-pBac-DsRed-X204HR          | Vector backbone was a gift from Kate O'Conner-Giles Lab                                                                             |                                                                |
| <b>Software and Algorithms</b> |                                                                                                                                     |                                                                |
| ImageJ                         | <a href="https://imagej.nih.gov/ij/">https://imagej.nih.gov/ij/</a>                                                                 |                                                                |
| Custom ImageJ plugins          | <a href="https://research.stowers.org/imagejplugins/zipped_plugins.html">research.stowers.org/imagejplugins/zipped_plugins.html</a> |                                                                |

1234
